# 1 Meltwater runoff from the Greenland Ice Sheet reveals microbial consortia 2 from contrasting subglacial drainage systems

3

4 Guillaume Lamarche-Gagnon<sup>1\*</sup>, Alexandre M. Anesio<sup>2</sup>, Jemma L. Wadham<sup>1</sup>, Jakub D.  
5 Zarsky<sup>3</sup>, Tyler J. Kohler<sup>4</sup>, Elizabeth A. Bagshaw<sup>5</sup>, Jon Telling<sup>6</sup>, Jon R. Hawkings<sup>7,8</sup>, Marek  
6 Stibal<sup>3</sup>

7 <sup>1</sup>School of Geographical Sciences, University of Bristol, Bristol BS8 1SS, UK

8 <sup>2</sup>Department of Environmental Science, Aarhus University, Aarhus, 4000 Roskilde, Denmark

9 <sup>3</sup>Department of Ecology, Faculty of Science, Charles University, Prague, 128 44, Czechia

10 <sup>4</sup>School of Architecture, Civil and Environmental Engineering, Ecole Polytechnique Fédérale de Lausanne, CH-  
11 1015 Lausanne, Switzerland

12 <sup>5</sup>School of Earth and Ocean Sciences, Cardiff University, Cardiff, UK

13 <sup>6</sup>School of Natural and Environmental Sciences, Newcastle University, Newcastle, UK

14 <sup>7</sup>National High Magnetic Field Lab and Earth, Ocean and Atmospheric Sciences, Florida State University,  
15 Tallahassee, Florida, USA

16 <sup>8</sup>German Research Centre for Geosciences GFZ, Potsdam, Germany

17

## 18 Abstract

19 Ice sheets overlay active and putatively widespread microbial ecosystems. An active subglacial  
20 biota has the potential to impact strongly on the (bio)geochemistry of local as well as  
21 downstream environments. Such impacts partly depend on the distribution of microbial  
22 populations, the types of habitats present beneath the ice, and their connectivity. In the ablation  
23 zone of the Greenland Ice Sheet (GrIS), supraglacial meltwaters are routed to the ice-sheet bed  
24 during the melt season, flushing out subglacial waters, sediments, and cells to proglacial  
25 environments via runoff. Here, we report on the diversity, composition, and niche  
26 differentiation of microbial assemblages exported in bulk runoff from a large (~600 km<sup>2</sup>) GrIS  
27 catchment. Proglacial river samples were collected over a period of subglacial drainage  
28 evolution in order to capture potential shifts in exported microbial community alongside  
29 hydrochemical transitions. We use high-resolution hydrochemical and hydrological  
30 information from the proglacial river to guide microbial (16S rRNA gene) interpretations. Core  
31 populations closely matched sequences previously isolated from other (pro)glacial  
32 environments, and phylogenetic characterisation of main OTUs alluded to a central role for  
33 subglacial iron, sulphur, and methane cycling. Whilst results indicate that bulk populations  
34 exported are likely true members of sub ice-sheet communities, we also find evidence of a  
35 supraglacial signature influencing composition of exported assemblages. Changes in  
36 assemblage structure accompanied those of major hydrological periods, with enhanced  
37 subglacial flushing coinciding with distinct shifts in microbial composition. Timing of sampling  
38 therefore matters when attempting to infer more nuanced changes in exported communities,  
39 or reveal the biogeochemical processes likely occurring in regions of the bed less influenced by  
40 surface melt. This is likely especially true when studying larger glacial systems, which  
41 experience complex hydrological changes throughout the melt-season, and that periods of

42 extensive subglacial flushing offer opportunities to assess diversity from more isolated regions  
43 of the bed. Still, an apparent strong buffering signal from marginal zones appear to mask some  
44 of the diversity intrinsic to more remote, likely anoxic, subglacial niches, which may ultimately  
45 only be sampled via direct access to the subsurface.

46

## 47 Introduction

48

49 The beds of glaciers and ice sheets contain liquid water and saturated sediments that are hosts  
50 to indigenous, active microbial communities (Skidmore *et al.*, 2000, Yde *et al.*, 2010, Christner  
51 *et al.*, 2014). Indirect observations and microcosm experiments suggest that microbial activity  
52 has an impact on both subglacial and downstream environments; e.g. by catalysing weathering  
53 reactions beneath the ice (Sharp *et al.*, 1999, Skidmore *et al.*, 2005, Mitchell *et al.*, 2013,  
54 Montross *et al.*, 2013) or via the generation and build-up of subglacial methane reserves (Stibal  
55 *et al.*, 2012, Wadham *et al.*, 2012, Burns *et al.*, 2018, Christiansen & Jørgensen, 2018, Lamarche-  
56 Gagnon *et al.*, 2019). But access to the subglacial environment remains difficult, and has often  
57 been limited to point sampling (e.g. of single marginal basal ice blocks or sediment cores) with  
58 poor temporal and spatial resolution (e.g. Stibal *et al.*, 2012, Doyle *et al.*, 2013, Montross *et al.*,  
59 2013, Christner *et al.*, 2014).

60

61 Sampling of rivers draining land-terminating glaciers offers indirect access to the subglacial  
62 system. During the ablation season, surface meltwaters are routed to the glacier bed, flushing  
63 subglacial waters, sediments, and concomitantly microbial cells to glacial margins and  
64 proglacial landscapes. An increasing number of studies have taken advantage of such approach,  
65 broadening our understanding of (sub)glacial microbial diversity worldwide (e.g. Wilhelm *et al.*,  
66 2013, Dieser *et al.*, 2014, Cameron *et al.*, 2017, Žárský *et al.*, 2018, Kohler *et al.*, 2020). However,  
67 glacier hydrological systems change over the course of the melt-season, which may influence  
68 the interpretations one can make from proglacial samples. Glaciers typically undergo a  
69 transition from tortuous-flow, slow and inefficient subglacial drainage during early melt  
70 (distributed system), to efficient fast-flow subglacial drainage in later months (channelised  
71 system; Davison *et al.*, 2019). Proglacial rivers are consequently sourced from waters of varying  
72 residence time beneath the ice depending on the state of the hydrological system. Timing of  
73 sampling can therefore influence, and potentially skew, interpretations if no additional  
74 information on the state of the glacier's hydrological system is considered. Knowledge on the  
75 provenance of subglacial waters (e.g. subglacial residence time, degree of rock-water contact

76 and weathering) also has the potential to inform on separate ecological niches present beneath  
77 the ice (Tranter et al., 2002, Tranter et al., 2005).

78

79 The influence of hydrology and hydrochemistry on proglacial microbial assemblages has  
80 previously been demonstrated. For example, Dubnick *et al.* (2017) showed that structural  
81 changes in microbial community exported from the Kiattuut Sermiat glacial catchment  
82 (southern Greenland) roughly followed changes in hydrochemistry throughout the melt season.  
83 Subtle shifts in microbial assemblages have also been linked with changes in geochemistry and  
84 water residence time in outflows of a small Alaskan glacier (Sheik *et al.*, 2015). Detailed  
85 microbial investigations of large glacial catchments are still lacking. Larger glaciers and ice-  
86 sheet margins undergo more dramatic, pronounced hydrological change throughout the melt  
87 season, draining more expansive areas, and likely export older, more remote bed material to  
88 the proglacial zone than their smaller counterparts (Wadham *et al.*, 2010, Kohler *et al.*, 2017).  
89 Consequently, proglacial rivers of larger catchments might offer a more complex picture of  
90 subglacial ecosystems provided changes in hydrological evolution is also monitored during  
91 microbial sampling.

92

93 The land-terminating Leverett Glacier (LG) drains an estimated ~600 km<sup>2</sup> of subglacial  
94 catchment in the southwest sector of the GrIS. Detailed studies of its proglacial river over the  
95 last decade have shed light onto many hydrological and biogeochemical processes central to  
96 our understanding of Greenlandic glaciers and their potential impacts on downstream systems  
97 (e.g. Chandler *et al.*, 2013, Hawkings *et al.*, 2015, Hawkings *et al.*, 2017). A key aspect of LG  
98 studies has been the ability to sample during periods of increased subglacial flushing (“outburst  
99 events”), normally driven by rapid supraglacial lake drainage (hydrofracturing) to the glacier  
100 bed (Bartholomew *et al.*, 2011, Davison *et al.*, 2019). A timeseries of LG proglacial microbial  
101 assemblages, and downstream mainstem Watson River, has been reported previously  
102 (Cameron *et al.*, 2017); however, it lacked the detailed bulk meltwater hydrochemical data  
103 required to link microbial diversity to subglacial hydrology. More recent investigations have  
104 also confirmed the catchment to be a net methane source and hosting active methanotrophic  
105 populations (Lamarche-Gagnon *et al.*, 2019).

106

107 Here, we provide a detailed investigation into the microbiome of the LG catchment by  
108 combining detailed hydrological and hydrochemical information collected during the 2015  
109 melt season (Kohler *et al.*, 2017, Hatton *et al.*, 2019, Lamarche-Gagnon *et al.*, 2019), with our

110 previous understanding of its subglacial hydrological system (Bartholomew *et al.*, 2011,  
111 Chandler *et al.*, 2013). We test whether sampling during periods of increased hydrological  
112 flushing (outbursts) allows for more complete microbial information from isolated sections of  
113 the bed, and whether the evolution in exported assemblage structure indicates the existence of  
114 different habitats and geochemical conditions in the subglacial catchment.

115

## 116 **Materials and Methods**

### 117 Sampling site

118 Leverett Glacier hydrology and hydrochemistry have been extensively studied over the last  
119 decade (e.g. Bartholomew *et al.*, 2011, Cowton *et al.*, 2012, Chandler *et al.*, 2013, Hawkings *et*  
120 *al.*, 2014, Hindshaw *et al.*, 2014, Clason *et al.*, 2015, Hawkings *et al.*, 2017, Kohler *et al.*, 2017).  
121 LG is a typical example of a large land-terminating (sub)glacial catchment with processes  
122 characteristic of the western margin of the GrIS (Hawkings *et al.*, 2015, Davison *et al.*, 2019).  
123 Davison *et al.* (2019) reviews our current understanding of the hydrology of land-terminating  
124 regions of the GrIS, including schematics (notably figures 6-8 therein), which are especially  
125 relevant to conceptualise the subglacial habitats described here. Snowline distance and surface  
126 digital elevation models put the surface catchment area of LG at around 1,200 km<sup>2</sup> (Palmer *et*  
127 *al.*, 2011; therein LG is referred to as RG), but an area of 600 km<sup>2</sup> more accurately depicts the  
128 subglacial catchment described here (Cowton *et al.*, 2012). LG underlays Precambrian  
129 orthogneiss and granite, common lithology to much of Greenland (Dawes, 2009) and its  
130 proglacial river is the main source of the Akuliarusiarsuup Kuua, itself a tributary to the Watson  
131 River near the town of Kangerlussuaq. A detailed description of LG can be found in the  
132 Supplementary Information of Lamarche-Gagnon *et al.* (2019).

133

### 134 Water sampling of molecular samples

135 A brief methods description of water sampling, DNA extraction, sequencing, and  
136 bioinformatics analyses can be found in Lamarche-Gagnon *et al.* (2019). Specifically, between  
137 ~ 600 – 2000 mL of LG bulk runoff was filtered through Sterivex filters (Millipore, USA)  
138 between June 07 and July 26 2015. Samples taken earlier (May 04-13) were also collected  
139 beneath river ice through boreholes and a chainsawed hole in front of the LG prior to the onset  
140 of the melt-season, and a set of samples collected on June 7<sup>th</sup> from a subglacial upwelling  
141 through river ice ~ 50 m from the glacier's terminus (see Lamarche-Gagnon *et al.* (2019) for  
142 details). The remainder of samples were collected approximately 500 m downstream from the  
143 LG portal (Fig. 1). Supplementary Table 1 details sampling volume, location and pooling of

144 replicate samples. Waters were either collected using 60 mL plastic syringes, or a peristaltic  
145 pump (Portapump-810, Williamson Manufacturing) equipped with silicon tubing following  
146 extensive flushing of the tubing with sample water. Sterivex filters were preserved in MoBio  
147 RNA LifeGuard solution (MoBio Laboratories, USA) immediately after sampling and frozen  
148 inside a portable freezer (<-10°C) within 1 hour of collection.

149

#### 150 Molecular analyses and initial sequence processing

151 DNA was extracted using the DNeasy PowerWater Sterivex kit (MoBio Laboratories, USA)  
152 following the manufacturer's protocol. Extracted DNA samples were then pooled into  
153 triplicates based on sample date prior to sequencing, with the exception of the L1 and L3  
154 samples (Table S1). Sequencing was performed at the Mr. DNA Molecular Research facility  
155 (Shallowater, TX, USA; <http://www.mrdnalab.com/>) on an Illumina MiSeq platform using  
156 the 515F/806r primer pair (Caporaso *et al.*, 2011), which targets the 16S rRNA V4  
157 hypervariable region.

158

159 Raw sequences were analysed on the mothur platform v.1.38.1 (Schloss *et al.*, 2009) on a remote  
160 server, mostly following the mothur MiSeq standard operation procedure (Kozich *et al.*, 2013)  
161 – full details on the specific mothur commands used are provided as Supplementary  
162 Information. In short, sequences were binned into operational taxonomical units (OTUs) at a  
163 97% sequence identity level and classified against the SILVA (v.123) database (Quast *et al.*,  
164 2012), following quality and chimera checks. OTUs composed of two reads or less (doubletons)  
165 were removed from further analyses. Downstream analyses (e.g. beta diversity analyses) were  
166 performed on a local machine on mothur v.1.37.5. Visualisation was performed in R (version  
167 3.5.0) (Team, 2018); the phyloseq package (McMurdie & Holmes, 2013) was also used for basic  
168 analyses. The 16S rRNA gene sequence data are available from the NCBI Sequence Read  
169 Archive (<https://www.ncbi.nlm.nih.gov/sra>) under BioProject PRJNA495593.

170

#### 171 Biodiversity analyses

172 Beta diversity amongst all samples was visualised using principal coordinate analyses (PCoA)  
173 and non-metric multidimensional scaling (nMDS) on an OTU similarity matrix calculated  
174 using the Bray-Curtis calculator in mothur. Prior to the generation of the similarity matrix,  
175 samples were first randomly subsampled to an equal number of reads (62,242); subsampling  
176 resulted in the exclusion of samples collected on July 1<sup>st</sup> (L7s) and L8A (see Table S2) due to  
177 their lower read numbers. Samples L7s and L8A were excluded from all analyses. The

178 significance of clustering based on the hydrological state of the LG river at the time of sampling  
179 (and amongst replicates) was tested by permutational multivariate analysis of variance  
180 (PERMANOVA) using the *adonis()* function in the R vegan package version 2.5.6 (Oksanen *et*  
181 *al.*, 2019). Homogeneity of dispersion, to test whether groupings have statistically (dis)similar  
182 dispersions, was conducted using the *betadisper()* function in vegan.

183

184 In order to gain further information on OTUs influencing the ordination clusterings above, the  
185 20 most influential OTUs (by p-value) were extracted from both the PCoA and nMDS using  
186 the ‘*corr.axes*’ command in mothur applying the spearman method to calculate correlation  
187 coefficients. Changes in relative abundance of these OTUs were visualised as a heatmap using  
188 the *heatmap.2()* function of the *gplots* package (Warnes *et al.*, 2019). Dendrogram organisation  
189 was produced using the Ward.2 method as it resulted in clusters more intuitive to  
190 interpretations.

191

#### 192 Phylogenetic tree

193 Sequence alignment and phylogenetic tree generation were performed in MEGA v.7.0.26.  
194 Sequences were first aligned by ClustalW using default settings. Aligned sequences were then  
195 trimmed to the region of interest (i.e. region spanning the 515 to 806 region of the 16S rRNA)  
196 and alignments visualised on maximum parsimony trees using 1000 bootstrap using the Jukes-  
197 Cantor method.

198

#### 199 Experimental design based on hydrological and hydrochemical evolution of the LG drainage 200 system

201 To interpret changes in microbial community structure within the context of their subglacial  
202 sources of export and ecological niche transitions, we also include hydrological and  
203 hydrochemical data from LG runoff. Figure 2 puts microbiological sampling in the context of  
204 the “hydrological state” of the LG system at the time of sampling based on our understanding  
205 of the LG drainage system during the 2015 melt-season (Kohler *et al.*, 2017, Hatton *et al.*, 2019,  
206 Lamarche-Gagnon *et al.*, 2019). Here, we also underline a few additional “hydrological states”  
207 that characterised the 2015 melt-season at LG, to better constrain the potential sources of  
208 exported microbial assemblages. Broadly, we follow the same hydrochemical interpretation  
209 from Hatton *et al.* (2019) and Dubnick *et al.* (2017), whereby increases in divalent ( $\text{Ca}^{2+}$ ,  $\text{Mg}^{2+}$ )  
210 to monovalent ( $\text{Na}^+$ ,  $\text{K}^+$ ) cation ratios (D:M) are interpreted to reflect a larger contribution of  
211 carbonate over silicate mineral weathering reactions to the cation load, respectively

212 hypothesised to derive from subglacial waters of shorter to longer residence times subglacially  
213 (see below).

214

215 The evolution of the subglacial drainage system at LG and its connectivity to the proglacial  
216 river can be inferred from changes and evolution in discharge, turbidity, and major ion  
217 chemistry, summarised in Figure 2. Early samples (L1) were collected from relatively stagnant  
218 or slow moving waters beneath the river ice in early May; L3 samples were collected following  
219 the emergence of a subglacial upwelling through river ice (~ June 01), which was accompanied  
220 by a switch in the relationship between major divalent and monovalent cations (Fig. 2c). The  
221 emergence of the upwelling also resulted in a rise in dissolved methane concentrations at the  
222 sampling site, further indicative of proglacial connectivity to the subglacial hydrological system  
223 of the marginal zone, driven by increased melt (Lamarche-Gagnon *et al.*, 2019).

224

225 The series of four pulses in SSC between June 19 and July 15 reflect the rapid drainage of  
226 supraglacial waters to the base of the glacier (Bartholomew *et al.*, 2011, Lamarche-Gagnon *et*  
227 *al.*, 2019). This large input of dilute meltwater mechanically disrupts the glacier's bed, flushing  
228 out waters with high sediment loads from a distributed hydrological system (Bartholomew *et al.*,  
229 2011). At LG, these outburst waters bear a chemical weathering signal characterised by  
230 increased silicate mineral dissolution compared to carbonate mineral dissolution, illustrated by  
231 a decrease in the D:M ratio, and reflective of longer residence time at the glacier's bed (Fig. 2b;  
232 Hatton *et al.*, 2019). The hydrochemical evolution from decreasing to increasing D:M ratios  
233 following the third outburst event (~ July 5<sup>th</sup>) may reflect a small relative increase in carbonate  
234 weathering signal from carbonation and hydrolysis of trace carbonates in an increasingly  
235 efficient drainage system, following the evacuation of long residence-time, over-winter stored  
236 waters (and sediments), or "mechanically renewed" by active bedrock comminution, in an  
237 expanded drainage system experiencing longer contact with fully oxygenated, highly turbulent,  
238 surface meltwaters (Brown, 2002). The evacuation of subglacial material from more remote  
239 sources can also be inferred by the export of suspended sediments bearing an older particulate  
240 organic carbon (POC) content during this period (Figure 2a; Kohler *et al.*, 2017). Lastly, the  
241 hydrological period following the last outburst at LG (after July 15) is reflective of a fully  
242 expanded, efficient and channelized drainage system (Hatton *et al.*, 2019).

243

244 Based on changes in runoff hydrochemistry, flow regime, and SSC, we can therefore separate  
245 the microbiological sampling schedule into five time periods. We herein define these different

246 stages as “pre-melt” (L1 samples); “upwelling” (L3 samples, June 1-18); and “outburst”. The  
247 latter is sub-divided into two: “early outburst” spanning the first 3 SSC pulses (June 19 – July  
248 3; L4 to L8), and “late outburst” (L9 to L11 samples); and “post-outburst”, or channelised, (July  
249 15<sup>th</sup> onward; L12-L13) periods (Fig. 2).

250

### 251 Hydrological and hydrochemical metadata

252 Methods for determination of suspended sediment concentrations (SSC) and discharge (Q)  
253 measurements can be found in Kohler *et al.* (2017), as well as Lamarche-Gagnon *et al.* (2019);  
254 processed sensor data is also available in Lamarche-Gagnon *et al.* (2019). In brief, turbidity  
255 (Partech C sensor) was converted to SSC by calibration against manual samples and discharge  
256 from pressure transducers (Druck and Hobo) and a mobile water depth sensor (Campbell  
257 Scientific SR50A) either deployed ~ 1.6 km (turbidity), or fixed in a bedrock section about 2  
258 km, downstream from the glacier’s terminus. Pressure/stage measurements were converted to  
259 a stage-discharge rating curve generated from calibration against repeated rhodamine dye  
260 injections over the full range of river stages during the melt season, as in Bartholomew *et al.*  
261 (2011).<sup>14</sup>C-POC data was taken from Kohler *et al.* (2017). Methods and data regarding  
262 monovalent and divalent cation concentrations for the proglacial river can be found in Hatton  
263 *et al.* (2019); major ion data for borehole waters are included here as supplementary information  
264 (Table S3). Borehole waters were collected using the peristaltic pump as for the collection of  
265 microbial samples. Storage and analyses of those samples were identical to that described in  
266 Hatton *et al.* (2019); analyses were also performed at the same time of the LG samples presented  
267 there. Briefly, water samples for major ion analyses were filtered through 0.45 µm cellulose  
268 nitrate filters (Whatman) mounted on portable filtration stack units (Nalgene) and stored  
269 refrigerated in the dark until analyses. Major ion concentrations were determined by ion  
270 chromatography (Thermo Scientific Dionex capillary ICS-5000) (Hawkings *et al.*, 2015).  
271 Dissolved oxygen, pH, and EC concentrations in borehole waters were measured using an  
272 Aanderaa Optode 3830 sensor, Honeywell Durafet pH sensor and Campbell Scientific 547,  
273 respectively (Table S3).

274

## 275 **Results**

### 276 Community composition

277 Overall, the bulk of exported microbial communities retained a stable make-up throughout the  
278 melt-season, with Proteobacteria, Bacteroidetes, Actinobacteria, Chloroflexi, Acidobacteria,



279 and Verrucomicrobia constituting the major phyla in all samples (Fig 3.a). At the order level,  
280 all samples were dominated by Burkholderiales, with a relatively stable composition of  
281 Nitrosomonadales and Sphingobacteriales (Fig. 3b). However, some important temporal  
282 differences were observed, such as a relatively large proportion of Methylococcales, and very  
283 low abundance of Flavobacteriales, present in pre-melt and late-season samples (i.e. L1 and  
284 L13), the near absence of Xanthomonadales before the melt season (L1), and a larger  
285 proportion of Anaerolineales sequences detected during the outburst period (Fig. 3b).

286

287 A similar pattern is retained when focusing on major OTUs (Fig. 3c, Table 1). The dominance  
288 of Burkholderiales is reflected by the most abundant OTU across all samples (OTU 1).  
289 Differences between pre-melt and post-outburst samples and the rest of the season are also  
290 reflected with the relative abundance of specific OTUs. That is, a much larger relative  
291 abundance in OTU 2 (Xanthomonadales), 6 (Flavobacteriales), and 8 (Anaerolineales) is  
292 observed for samples collected during the outburst periods, whereas OTU 3 (Methylophilales),  
293 9 and 16 (Methylococcales), and 11 (Pseudomonadales) were most abundant in the pre-melt  
294 and latest samples (L1 and L13; Fig. 3c). OTU 7 (Verrucomicrobiales) is also markedly more  
295 abundant during the post-outburst period (L12-13). Archaea only represented a minority of  
296 sequences, with the most abundant archaeal OTUs accounting for less than 0.1% sequences in  
297 most samples (Fig. S1). Of note is OTU 137, made up of Methanosarcinales sequences related  
298 ANME-2d anaerobic methane oxidising archaea, which also exhibited a marked increase in  
299 relative abundance in pre-melt and post-outburst samples (Fig. S1-2).

300

### 301 Temporal evolution of exported microbial assemblages

302 Whilst focusing on the most abundant populations did not allude to major community changes  
303 during the sampling period, whole-community comparisons, however, did highlight specific  
304 patterns in community assemblages and reveal a temporal evolution in exported microbial  
305 community structure that closely followed changes in hydrochemical states of exported waters.  
306 The most distinct microbial communities are observed for samples collected prior to the onset  
307 of the melt-season (L1) and the very last set of samples collected during the period of efficient  
308 (channelised) subglacial drainage (L13) (Fig. 3b, c). When communities are visualised through  
309 ordinations of Bray-Curtis dissimilarities, L1 and L13 samples indeed clearly cluster separately  
310 from those exported during the upwelling and outburst periods (L3-L11) (Fig 4a, b). Such  
311 changes are mostly illustrated by shifts along the vertical axes of the PCoA and nMDS plots,  
312 which depict the highest level of variation amongst communities. Although more subtle, a clear

313 evolution in community structure can also be seen between samples collected following the  
314 onset of the melt-season (L3-L11), characterised by shifts along the x axes of Figure 4a, b.  
315 Differences between samples are more apparent on the nMDS plot (Fig. 4b). On the PCoA,  
316 “outburst communities” are better grouped temporally, with samples flushed out during the  
317 period of the first three outbursts (~ June 19 to July 5) forming a separate cluster to the last one  
318 (L10-L11; ~ July 6-13; Fig. 4a).

319  
320 The “transition” in community structure observed between early and late outburst clusters  
321 coincided with a change in hydrochemical regime, highlighted by a small change in major  
322 divalent to monovalent cation relationship and age transition of exported POC (Fig. 2), likely  
323 reflective of the flushing of subglacial sediments and waters with difference residence times  
324 (Kohler *et al.*, 2017). This change in microbial assemblages between the first 3 outbursts  
325 (samples L4-L8) and the last one (samples L10s-L11s) is further illustrated by the community  
326 structure of L9 samples, collected during this outburst transition period, which roughly centre  
327 both PCoA and nMDS plots (Figure 4 a, b). It should be noted that L12 samples were  
328 homogenised from waters collected during two distinct hydrological stages; both L12 and L13  
329 samples were also grouped from waters and sediments of different POC age, which may have  
330 resulted in dampening observed microbial changes that may have occurred during this later  
331 time period (Fig. 2).

332  
333 Isolating the OTUs that most influenced ordination clustering provides further information on  
334 the potential hydrological mechanisms responsible for the restructuring of proglacial  
335 assemblages during the melt-season (Fig. 4c). Broadly, earlier and later communities appear  
336 most influenced by populations with a potential supraglacial origin, whereas a higher  
337 proportion of sequences related to clades typically associated with more hypoxic/anoxic  
338 environments appear over-represented in outburst communities (Fig. 4c, Table 2). Again, the  
339 apparent ‘transition nature’ of L9 samples is apparent by no relative increase in any of these  
340 OTUs.

341

## 342 Discussion

343 The observation of a sustained core microbiome throughout the melt season at LG aligns with  
344 an increasing number of studies of proglacial meltwater systems (Dieser *et al.*, 2014, Sheik *et al.*,  
345 *et al.*, 2015, Kohler *et al.*, 2020). Composition of exported communities during the 2015 melt-

346 season also reflects that of a previous study in the region (Cameron *et al.*, 2017), but also in  
347 glacial systems elsewhere (Kohler *et al.*, 2020), and strengthens the view of major phylotypes  
348 characterising the subglacial margin of glaciers worldwide. For example, the dominance of  
349 Betaproteobacteria has previously been proposed to be a main constituent of subglacial  
350 communities (Boetius *et al.*, 2015, Kohler *et al.*, 2020), and Betaproteobacteria account for the  
351 majority of exported populations at LG (most Betaproteobacteria sequences fall within the  
352 order Burkholderiales at LG). The same is true for other major LG orders (Xanthomonadales,  
353 Sphingobacteriales, Micrococcales, etc.), which have also been shown to dominate previously  
354 monitored proglacial rivers (Kohler *et al.*, 2020).

355

356 Whether this conserved microbiome is representative of a relatively homogeneous, ‘blanket’  
357 ecosystem beneath the ice, however, is difficult to reconcile from proglacial communities alone.  
358 The persistence of a core microbiota throughout the melt season (i.e. present in every sample)  
359 argues for some degree of homogenisation, either regarding the subglacial environment itself,  
360 or reflective of mixing processes during transport to the ice margin, or a combination of the  
361 two (e.g. Žárský *et al.*, 2018). As such, our view of community assemblages sampled at LG (and  
362 elsewhere) are likely biased towards more marginal populations, or those indigenous to flanking  
363 regions of main drainage channels beneath the ice (e.g. hyporheic-like regions; see Tranter *et*  
364 *al.* (2005)), “ironing-out” signals from more remote subglacial communities. That said, glacial  
365 hydrology has previously been demonstrated to exert (some degree of) control on microbial  
366 assemblages exported to the proglacial zone, and it is possible to link subglacial water residence-  
367 time to changes in community structures (Sheik *et al.*, 2015, Dubnick *et al.*, 2017). Here, the  
368 high-resolution hydrochemical and hydrological information from the proglacial river allows  
369 further inferences on the subglacial niche partitioning that may be present beneath larger ice-  
370 sheet catchments such as LG, which undergoes more complex hydrological evolution than its  
371 smaller counterparts (Davison *et al.*, 2019).

372

### 373 Hydrological forcing on exported microbial assemblages

374 Niche differentiation between a channelized and distributed system beneath the ice (Figs. 4)  
375 supports previously proposed conceptual models of subglacial habitats. Oxic meltwaters  
376 entering major drainage channels should maintain a more oxidizing environment capable of  
377 sustaining (micro)aerobic populations, and create a gradient of increasingly reducing/anoxic  
378 conditions with distance from main channels to distributed regions of the bed, more favourable  
379 to communities relying on more reduced electron acceptors (Tranter *et al.*, 2005, Hodson *et al.*,

380 2008). The relative decrease in abundance of putative aerobic methyl- an methanotrophic  
381 clades (e.g. OTUs, 3, 9, 16 Figs 3c; Table 1) at the expense of (putatively) anaerobic ones (e.g.  
382 of the order Anaerolineales; Fig. 3, 4; Tables 1, 2) during periods of enhanced subglacial  
383 flushing (outbursts) suggests such methylophilic populations may be more constrained to  
384 glacial/channel margins beneath the catchment, and agrees with previous models of increased  
385 hypoxia/anoxia away from main drainage channels. Anaerolineales also comprised a large  
386 fraction of phylotypes detected in small subglacial outflows of the neighbouring Russell Glacier,  
387 when supraglacially-sourced sequences were removed from bulk community observations  
388 (Dieser et al., 2014).

389

### 390 Supraglacial runoff imprints on proglacial communities

391 OTUs significantly impacting community changes following the outburst period largely  
392 comprised of sequences related to those from glacier surfaces (e.g. cryoconite holes; Fig. 4c,  
393 Table 2), likely reflecting the dominance of rapid subglacial transport of lower residence-time  
394 waters via an efficient, channelised drainage system (Chandler *et al.*, 2013). This later-season  
395 trend at LG likely reflects that previously observed in smaller glacier systems that experience  
396 less dramatic hydrological change, not influenced by supraglacial lake-drainage (outburst)  
397 events. For example, Dubnick *et al.* (2017) described the evolution of the Kiattuut Sermiat  
398 drainage system as an ongoing dilution of the subglacial signal by supraglacial waters, with a  
399 microbiological signature of exported assemblages approaching that of supraglacial  
400 communities as the season progressed. Proglacial rivers fed by multiple glaciers on Qeqertasuaq  
401 (Disko Island, West Greenland) during the late melt-season in August 2015 also revealed large  
402 contributions of subglacial meltwaters to community assemblages (Žárský *et al.*, 2018).

403

### 404 Colonisation of the ice sheet bed

405 Similarities between communities exported later in the season (L13) and those observed in front  
406 of the ice-sheet beneath the river ice in early May (L1) suggest some retention of late-season  
407 meltwater (populations) at the glacier's margin and forefield, following hydrological shut-down  
408 at the end of the melt-season, and is consistent with recent study of glacier naled ice  
409 communities in Svalbard (Sułowicz *et al.*, 2020). This probably indicates that very early basal-  
410 melt waters carry a legacy of assemblages from the previous melt season, alongside populations  
411 derived from basal ice, and may explain the higher proportions of phylotypes related to glaciers'  
412 surfaces (e.g. OTU 3) in L1 samples (Fig. 2, 4, Tables 1-2). It also indicates a stronger surface  
413 signal than previously expected might be retained subglacially, despite surface waters

414 containing an order of magnitude less cells than those of the LG proglacial river (Cameron *et*  
415 *al.*, 2017). It should be noted that this “supraglacial legacy signature” inferred from microbial  
416 populations is “lost” when looking at water chemistry, which bears a strong basal signature  
417 typical of a distributed drainage system very early on in the melt season, and which is very  
418 distinct from that observed during the late season (Bartholomew *et al.*, 2011, Hindshaw *et al.*,  
419 2014, Kellerman *et al.*, 2020). Late-season communities retained subglacially or at the glacier  
420 front likely undergo selection overwinter and therefore supraglacial influence is probably more  
421 important for generalist populations than those adapted to glacial surfaces such as *Cyanobacteria*  
422 (Gokul *et al.*, 2019). For example, *Cyanobacteria* here accounted for less than 0.03% of all  
423 sequences (data not shown), which at first glance would argue against a significant imprint of  
424 surface melt on the observed communities. The potential influence of glacier surface  
425 populations in shaping subglacial biota has recently been highlighted by a study of GrIS surface  
426 waters, which revealed a high-abundance of phylotypes related to those typically associated to  
427 subglacial systems (Gokul *et al.*, 2019).

428

#### 429 Inferred metabolic functions of exported microbial assemblages

430 Although we are aware of the limitations in unambiguously assigning metabolic functions to  
431 specific phylotypes based on (partial) 16S rRNA sequence information alone, comparison  
432 against the public repository can still inform on the putative metabolism of some LG  
433 populations. Amongst others, the representative sequence of major OTUs identically or closely  
434 matched those isolated from other cold and/or glaciated environments, as well as those  
435 involved in methane, sulphur, and iron cycling (Table 1). The most abundant phylotype  
436 detected in all samples, OTU 1, perfectly matched partial 16S rRNA sequences of *Rhodoferrax*  
437 *ferrireducens*, a psychrotolerant facultative anaerobe that can reduce Fe(III) using a range of  
438 simple organic compounds (Finneran *et al.*, 2003). *Rhodoferrax* species have previously been  
439 shown to dominate iron-reducing enrichments with LG basal ice (Nixon *et al.*, 2016), making it  
440 likely that OTU 1 indeed carries on iron-reduction, and therefore that iron reduction plays a  
441 key function beneath the LG catchment. A strong potential for iron and sulphur (e.g. pyrite)  
442 oxidation is also highlighted by other dominant OTUs (OTUs 5, 14, and 20; Table 1), and  
443 allude to a complete iron cycle beneath the ice and its link to pyrite or other iron-sulphur  
444 cycling. As found in other glacial environments, these putative (iron)-sulphur oxidisers may also  
445 act as primary producers, supplying carbon to the subglacial system via chemolithoautotrophy  
446 (e.g. *Synderoxidans* – OTU 5, and *Thiobacillus* – OTU 14 *sp.*; Boyd *et al.* (2014)).

447

448 Methane cycling beneath LG has been previously demonstrated, as well as the presence of  
449 methanotrophs related to *Methylobacter tundripaludum* (OTU 9; Table 1), and to a lesser extent  
450 methanogens (Supp. Fig. tree/OTUs), in LG proglacial runoff (Lamarche-Gagnon *et al.*, 2019).  
451 Additional potential methanotrophic clades are further identified here (e.g. OTU 16; Fig). 16S  
452 rRNA results mostly agree with a recent metagenomic investigation of methane-cycling genes  
453 from the same sampling season (Rybár, 2020), re-enforcing the view on the function of putative  
454 methano- genic/trophic OTUs. That is, the temporal distribution of methanotrophic 16S  
455 rRNA sequences (elevated in early, “pre-melt” samples and post-outburst period, Fig. 3) was  
456 also reflected in a relative increase of *pmoA* genes (functional marker of aerobic methanotrophy)  
457 during the same overall periods (Rybár, 2020). Again similar to found with 16S rRNA  
458 sequencing, *mcrA* genes (functional marker for methanogenesis) were only recovered in very low  
459 quantities within the LG metagenomes, and were related to hydrogenotrophic clades (Rybár,  
460 2020); most LG methanogen-related 16S rRNA sequences also belonged to known H<sub>2</sub>-  
461 oxidising taxa – as opposed to acetoclastic ones (Fig. S1-2; Lamarche-Gagnon *et al.*, 2019). A  
462 notable difference, however, was the absence of (*mcrA*) sequences related to anaerobic methane  
463 oxidising archaea (ANME) in the LG metagenomes (Rybár, 2020), which contrasts with 16S  
464 rRNA results here. The most abundant archaeal phylotype (OTU 137) beneath the river-ice  
465 in May and during the later season most closely relate to recently characterised anaerobic  
466 methane oxidisers of the clade ANME-2d, which couples methane oxidation to iron reduction  
467 (Fig. S2; Cai *et al.*, 2018). Similar sequences have also been identified in the sediments of the  
468 alpine Robertson Glacier, Canada, and inferred to belong to anaerobic methane oxidisers (Fig.  
469 S2; Boyd *et al.*, 2010). ANME-2d sequences have also been identified in anaerobic delta  
470 sediments of the Watson River, fed by LG meltwaters, and their methanotrophic activity  
471 suggested by long-term incubation experiments (Cameron *et al.*, 2017).

472

### 473 **A microbial window into the subglacial environment**

474 The data presented here grant a glimpse through a microbial window into the LG subglacial  
475 system. We observe a subglacial microbiome potentially centred on chemo(auto)trophic iron-  
476 cycling (e.g. OTUs 1, 5, 20), supporting the idea that the high abundance of nanoparticulate  
477 iron (oxy)hydroxides found previously at LG are bioavailable and/or are the product of  
478 biogeochemical weathering (Hawkings *et al.*, 2014, Hawkings *et al.*, 2018). Methanotrophic and  
479 methylotrophic clades (e.g. OTUs 3, 9, 16) appear more prominent in well-aerated regions of  
480 the bed, or those seasonally influenced by supraglacial melt, including the proglacial zone all  
481 throughout the winter period (L1). We therefore find that supraglacial melt, likely the oxygen

482 it carries, but also potentially allochthonous organic carbon and cells (Lawson *et al.*, 2014,  
483 Kellerman *et al.*, 2020), appears to shape the biota of the subglacial environment beneath the  
484 margin of the GrIS, as has been alluded to for small glacier systems (Tranter *et al.*, 2005). The  
485 main drainage channels and ice margins seem to operate as a methanotrophic strip, relying on  
486 both oxygen supply from the surface and methane from deeper sediment/till layers, and more  
487 isolated sections of the bed (Lamarche-Gagnon *et al.*, 2019). However, the very low abundance  
488 of methanogen phylotypes detected despite elevated concentrations of methane exported from  
489 the catchment (Lamarche-Gagnon *et al.*, 2019) suggests that our snapshot is an incomplete  
490 portrayal of the LG subglacial ecosystem. Fermentation of old organic carbon may play a more  
491 important role in more remote sections of the bed given the relative increase of putative  
492 fermenters (e.g. of the order *Anaerolineales*; McIlroy *et al.*, 2017) exported during outburst events.

493

494 The ecosystem depicted here looks highly similar to that described in Whillans Subglacial Lake  
495 (SLW) beneath Antarctica, despite it being a far more isolated ice-sheet environment (e.g. not  
496 influenced by supraglacial melt) compared to the LG drainage system. There, the availability  
497 of methane, sulphur, iron, and oxygen (amongst other) also appears to shape microbial  
498 communities of the lake micro-oxic waters influenced by basal melt, and the more anoxic  
499 underlying lake sediments (Christner *et al.*, 2014, Michaud *et al.*, 2017). Interestingly, major  
500 SLW phylotypes were similar or identical (i.e. 100% sequence identity; data not shown) to those  
501 described here (i.e. *Rhodoferrax* - there reported as *Albidiferrax* - *Sideroxydans*, *Thiobacillus*, and  
502 *Methylobacter* species; Purcell *et al.*, 2014, Achberger *et al.*, 2016). The very low abundance of  
503 methanogens in SLW despite the high methane concentrations in sediments also resembles  
504 descriptions here. Some of the information obtained at LG can therefore likely be extended to  
505 a more general view of ice-sheet beds, further highlighting similarities between glacial  
506 environments worldwide (Kohler *et al.*, 2020), even under contrasting hydrological regimes.  
507 Still, a full picture of subglacial ecosystems may ultimately only be depicted via direct access to  
508 the subsurface through drilling operations, or potentially via more extensive sampling and  
509 sequencing efforts.

510

## 511 Acknowledgment

512 We thank J. E. Hatton, A. D. Beaton, and A. J. Tedstone who assisted with fieldwork at LG.  
513 This research was supported by Czech Science Foundation grants (GACR; 15-17346Y and 18-  
514 12630S) to M.S. and a UK NERC grant (NE/J02399X/1) to A.M.A. for DNA analyses. This

515 research was also part of the UK NERC funded DELVE programme (NERC grant  
516 NE/I008845/1 to J.L.W.). G.L.-G. was funded by the University of Bristol Scholarship  
517 Programme and a FRQNT Scholarship (number 185136). The work was also supported by a  
518 Leverhulme research fellowship to J.L.W. J.R.H. was supported by a European Union Horizon  
519 2020 research and innovation grant under the Marie Skłodowska-Curie Actions fellowship  
520 ICICLES (grant agreement #793962). We also thank the Kangerlussuaq International Science  
521 Station, especially Rikka Møller, for support with field logistics.

522

## 523 References

524 Achberger AM, Christner BC, Michaud AB, *et al.* (2016) Microbial Community Structure of  
525 Subglacial Lake Whillans, West Antarctica. *Frontiers in Microbiology* **7**.

526 Bartholomew I, Nienow P, Sole A, Mair D, Cowton T, Palmer S & Wadham J (2011)  
527 Supraglacial forcing of subglacial drainage in the ablation zone of the Greenland ice sheet.  
528 *Geophysical Research Letters* **38**: n/a-n/a.

529 Boetius A, Anesio AM, Deming JW, Mikucki JA & Rapp JZ (2015) Microbial ecology of the  
530 cryosphere: sea ice and glacial habitats. *Nature Reviews Microbiology*.

531 Boyd ES, Skidmore M, Mitchell AC, Bakermans C & Peters JW (2010) Methanogenesis in  
532 subglacial sediments. *Environ Microbiol Rep* **2**: 685-692.

533 Boyd ES, Hamilton TL, Havig JR, Skidmore ML & Shock EL (2014) Chemolithotrophic  
534 Primary Production in a Subglacial Ecosystem. *Applied and environmental microbiology* **80**: 6146-  
535 6153.

536 Brown GH (2002) Glacier meltwater hydrochemistry. *Applied Geochemistry* **17**: 855-883.

537 Burns R, Wynn PM, Barker P, *et al.* (2018) Direct isotopic evidence of biogenic methane  
538 production and efflux from beneath a temperate glacier. *Scientific Reports* **8**: 17118.

539 Cai C, Leu AO, Xie G-J, Guo J, Feng Y, Zhao J-X, Tyson GW, Yuan Z & Hu S (2018) A  
540 methanotrophic archaeon couples anaerobic oxidation of methane to Fe(III) reduction. *The*  
541 *ISME Journal* **12**: 1929-1939.

542 Cameron KA, Stibal M, Olsen NS, Mikkelsen AB, Elberling B & Jacobsen CS (2017) Potential  
543 Activity of Subglacial Microbiota Transported to Anoxic River Delta Sediments. *Microbial*  
544 *Ecology* **74**: 6-9.

545 Cameron KA, Stibal M, Hawkings JR, Mikkelsen AB, Telling J, Kohler TJ, Gözdereliler E,  
546 Zarsky JD, Wadham JL & Jacobsen CS (2017) Meltwater export of prokaryotic cells from the  
547 Greenland ice sheet. *Environmental Microbiology* **19**: 524-534.



- 548 Caporaso JG, Lauber CL, Walters WA, Berg-Lyons D, Lozupone CA, Turnbaugh PJ, Fierer  
549 N & Knight R (2011) Global patterns of 16S rRNA diversity at a depth of millions of sequences  
550 per sample. *Proceedings of the National Academy of Sciences* **108**: 4516-4522.
- 551 Chandler DM, Wadham JL, Lis GP, *et al.* (2013) Evolution of the subglacial drainage system  
552 beneath the Greenland Ice Sheet revealed by tracers. *Nature Geosci* **6**: 195-198.
- 553 Christiansen JR & Jørgensen CJ (2018) First observation of direct methane emission to the  
554 atmosphere from the subglacial domain of the Greenland Ice Sheet. *Scientific Reports* **8**: 16623.
- 555 Christner BC, Priscu JC, Achberger AM, *et al.* (2014) A microbial ecosystem beneath the West  
556 Antarctic ice sheet. *Nature* **512**: 310-313.
- 557 Clason CC, Mair DWF, Nienow PW, Bartholomew ID, Sole A, Palmer S & Schwanghart W  
558 (2015) Modelling the transfer of supraglacial meltwater to the bed of Leverett Glacier,  
559 Southwest Greenland. *The Cryosphere* **9**: 123-138.
- 560 Cowton T, Nienow P, Bartholomew I, Sole A & Mair D (2012) Rapid erosion beneath the  
561 Greenland ice sheet. *Geology* **40**: 343-346.
- 562 Davison BJ, Sole AJ, Livingstone SJ, Cowton TR & Nienow PW (2019) The Influence of  
563 Hydrology on the Dynamics of Land-Terminating Sectors of the Greenland Ice Sheet. *Frontiers*  
564 *in Earth Science* **7**.
- 565 Dawes PR (2009) The bedrock geology under the Inland Ice: the next major challenge for  
566 Greenland mapping. *Geological Survey of Denmark and Greenland Bulletin* **17**: 57-60.
- 567 Dieser M, Broems EL, Cameron KA, King GM, Achberger A, Choquette K, Hagedorn B,  
568 Sletten R, Junge K & Christner BC (2014) Molecular and biogeochemical evidence for  
569 methane cycling beneath the western margin of the Greenland Ice Sheet. *ISME J* **8**: 2305-  
570 2316.
- 571 Doyle SM, Montross SN, Skidmore ML & Christner BC (2013) Characterizing microbial  
572 diversity and the potential for metabolic function at -15°C in the Basal Ice of Taylor Glacier,  
573 Antarctica. *Biology* **2**: 1034-1053.
- 574 Dubnick A, Kazemi S, Sharp M, Wadham J, Hawkings J, Beaton A & Lanoil B (2017)  
575 Hydrological controls on glacially exported microbial assemblages. *Journal of Geophysical Research:*  
576 *Biogeosciences* **122**: 1049-1061.
- 577 Finneran KT, Johnsen CV & Lovley DR (2003) *Rhodoferrax ferrireducens* sp. nov., a  
578 psychrotolerant, facultatively anaerobic bacterium that oxidizes acetate with the reduction of  
579 Fe (III). *International Journal of Systematic and Evolutionary Microbiology* **53**: 669-673.
- 580 Gokul JK, Cameron KA, Irvine-Fynn TDL, Cook JM, Hubbard A, Stibal M, Hegarty M, Mur  
581 LAJ & Edwards A (2019) Illuminating the dynamic rare biosphere of the Greenland Ice Sheet's  
582 Dark Zone. *FEMS Microbiology Ecology* **95**.

- 583 Hatton JE, Hendry KR, Hawkings JR, Wadham JL, Kohler TJ, Stibal M, Beaton AD,  
584 Bagshaw EA & Telling J (2019) Investigation of subglacial weathering under the Greenland Ice  
585 Sheet using silicon isotopes. *Geochimica et Cosmochimica Acta*.
- 586 Hawkings JR, Wadham JL, Benning LG, Hendry KR, Tranter M, Tedstone A, Nienow P &  
587 Raiswell R (2017) Ice sheets as a missing source of silica to the polar oceans. *Nature*  
588 *Communications* **8**: 14198.
- 589 Hawkings JR, Wadham JL, Tranter M, Raiswell R, Benning LG, Statham PJ, Tedstone A,  
590 Nienow P, Lee K & Telling J (2014) Ice sheets as a significant source of highly reactive  
591 nanoparticulate iron to the oceans. *Nat Commun* **5**: 3929.
- 592 Hawkings JR, Benning LG, Raiswell R, Kaulich B, Araki T, Abyaneh M, Stockdale A, Koch-  
593 Müller M, Wadham JL & Tranter M (2018) Biolabile ferrous iron bearing nanoparticles in  
594 glacial sediments. *Earth and Planetary Science Letters* **493**: 92-101.
- 595 Hawkings JR, Wadham JL, Tranter M, *et al.* (2015) The effect of warming climate on nutrient  
596 and solute export from the Greenland Ice Sheet. *Geochemical Perspectives Letters* **1**: 94-104.
- 597 Hindshaw RS, Rickli J, Leuthold J, Wadham J & Bourdon B (2014) Identifying weathering  
598 sources and processes in an outlet glacier of the Greenland Ice Sheet using Ca and Sr isotope  
599 ratios. *Geochimica et Cosmochimica Acta* **145**: 50-71.
- 600 Hodson A, Anesio AM, Tranter M, Fountain A, Osborn M, Priscu J, Laybourn-Parry J &  
601 Sattler B (2008) Glacial ecosystems. *Ecological Monographs* **78**: 41-67.
- 602 Kellerman AM, Hawkings JR, Wadham JL, Kohler TJ, Stibal M, Grater E, Marshall M,  
603 Hatton JE, Beaton A & Spencer RGM (2020) Glacier Outflow Dissolved Organic Matter as a  
604 Window Into Seasonally Changing Carbon Sources: Leverett Glacier, Greenland. *Journal of*  
605 *Geophysical Research: Biogeosciences* **125**: e2019JG005161.
- 606 Kohler TJ, Žárský JD, Yde JC, Lamarche-Gagnon G, Hawkings JR, Tedstone AJ, Wadham  
607 JL, Box JE, Beaton AD & Stibal M (2017) Carbon dating reveals a seasonal progression in the  
608 source of particulate organic carbon exported from the Greenland Ice Sheet. *Geophysical Research*  
609 *Letters* 6209-6217.
- 610 Kohler TJ, Vinšová P, Falteisek L, *et al.* (2020) Patterns in Microbial Assemblages Exported  
611 From the Meltwater of Arctic and Sub-Arctic Glaciers. *Frontiers in Microbiology* **11**.
- 612 Kozich JJ, Westcott SL, Baxter NT, Highlander SK & Schloss PD (2013) Development of a  
613 Dual-Index Sequencing Strategy and Curation Pipeline for Analyzing Amplicon Sequence  
614 Data on the MiSeq Illumina Sequencing Platform. *Applied and environmental microbiology* **79**: 5112-  
615 5120.
- 616 Lamarche-Gagnon G, Wadham JL, Sherwood Lollar B, *et al.* (2019) Greenland melt drives  
617 continuous export of methane from the ice-sheet bed. *Nature* **565**: 73-77.

- 618 Lawson EC, Wadham JL, Tranter M, Stibal M, Lis GP, Butler CEH, Laybourn-Parry J,  
619 Nienow P, Chandler D & Dewsbury P (2014) Greenland Ice Sheet exports labile organic  
620 carbon to the Arctic oceans. *Biogeosciences* **11**: 4015-4028.
- 621 McIlroy SJ, Kirkegaard RH, Dueholm MS, Fernando E, Karst SM, Albertsen M & Nielsen  
622 PH (2017) Culture-Independent Analyses Reveal Novel Anaerolineaceae as Abundant Primary  
623 Fermenters in Anaerobic Digesters Treating Waste Activated Sludge. *Frontiers in Microbiology* **8**.
- 624 McMurdie P & Holmes S (2013) phyloseq: An R Package for Reproducible Interactive Analysis  
625 and Graphics of Microbiome Census Data. *PLoS ONE* **8**: e61217-e61217.
- 626 Michaud AB, Dore JE, Achberger AM, Christner BC, Mitchell AC, Skidmore ML, Vick-  
627 Majors TJ & Priscu JC (2017) Microbial oxidation as a methane sink beneath the West  
628 Antarctic Ice Sheet. *Nature Geosci* **10**: 582-586.
- 629 Mitchell AC, Lafreniere MJ, Skidmore ML & Boyd ES (2013) Influence of bedrock mineral  
630 composition on microbial diversity in a subglacial environment. *Geology* **41**: 855-858.
- 631 Montross S, Skidmore M, Christner B, Samyn D, Tison J-L, Lorrain R, Doyle S & Fitzsimons  
632 S (2013) Debris-Rich Basal Ice as a Microbial Habitat, Taylor Glacier, Antarctica.  
633 *Geomicrobiology Journal* **31**: 76-81.
- 634 Montross SN, Skidmore M, Tranter M, Kivimäki A-L & Parkes RJ (2013) A microbial driver  
635 of chemical weathering in glaciated systems. *Geology* **41**: 215-218.
- 636 Nixon SL, Telling J, Wadham JL & Cockell CS (2016) Viable cold-tolerant iron-reducing  
637 microorganisms in geographically-isolated subglacial environments. *Biogeosciences Discuss* **2016**:  
638 1-19.
- 639 Oksanen J, Blanchet F, Friendly M, Kindt R, Legendre P & McGlinn D (2019) vegan:  
640 Community Ecology Package. R package version 2.5–6. 2019. p.^pp. [https://CRAN.R-](https://CRAN.R-project.org/package=vegan)  
641 [project.org/package=vegan](https://CRAN.R-project.org/package=vegan).
- 642 Palmer S, Shepherd A, Nienow P & Joughin I (2011) Seasonal speedup of the Greenland Ice  
643 Sheet linked to routing of surface water. *Earth and Planetary Science Letters* **302**: 423-428.
- 644 Purcell AM, Mikucki JA, Achberger A, *et al.* (2014) Microbial sulfur transformations in  
645 sediments from Subglacial Lake Whillans. *Frontiers in Microbiology* **5**.
- 646 Quast C, Pruesse E, Gerken J, Peplies J, Yarza P, Yilmaz P, Schweer T & Glöckner FO (2012)  
647 The SILVA ribosomal RNA gene database project: improved data processing and web-based  
648 tools. *Nucleic Acids Research* **41**: D590-D596.
- 649 Rybár M (2020) Genetic potential for methane metabolism in the Greenland subglacial  
650 ecosystem. MSc Thesis, Charles University.

- 651 Schloss PD, Westcott SL, Ryabin T, *et al.* (2009) Introducing mothur: Open-Source, Platform-  
652 Independent, Community-Supported Software for Describing and Comparing Microbial  
653 Communities. *Applied and environmental microbiology* **75**: 7537-7541.
- 654 Sharp M, Parkes J, Cragg B, Fairchild IJ, Lamb H & Tranter M (1999) Widespread bacterial  
655 populations at glacier beds and their relationship to rock weathering and carbon cycling. *Geology*  
656 **27**: 107-110.
- 657 Sheik CS, Stevenson EI, Den Uyl PA, Arendt CA, Aciego SM & Dick GJ (2015) Microbial  
658 communities of the Lemon Creek Glacier show subtle structural variation yet stable  
659 phylogenetic composition over space and time. *Frontiers in Microbiology* **6**.
- 660 Skidmore M, Anderson SP, Sharp M, Foght J & Lanoil BD (2005) Comparison of Microbial  
661 Community Compositions of Two Subglacial Environments Reveals a Possible Role for  
662 Microbes in Chemical Weathering Processes. *Applied and environmental microbiology* **71**: 6986-  
663 6997.
- 664 Skidmore ML, Foght JM & Sharp MJ (2000) Microbial Life beneath a High Arctic Glacier.  
665 *Applied and environmental microbiology* **66**: 3214-3220.
- 666 Stibal M, Hasan F, Wadham JL, Sharp MJ & Anesio AM (2012) Prokaryotic diversity in  
667 sediments beneath two polar glaciers with contrasting organic carbon substrates. *Extremophiles*  
668 **16**: 255-265.
- 669 Stibal M, Wadham JL, Lis GP, *et al.* (2012) Methanogenic potential of Arctic and Antarctic  
670 subglacial environments with contrasting organic carbon sources. *Global Change Biology* **18**:  
671 3332-3345.
- 672 Sułowicz S, Bondarczuk K, Ignatiuk D, Jania JA & Piotrowska-Seget Z (2020) Microbial  
673 communities from subglacial water of naled ice bodies in the forefield of Werenskioldbreen,  
674 Svalbard. *Science of The Total Environment* **723**: 138025.
- 675 Team RC (2018) R: A language and environment for statistical computing. R Foundation for  
676 Statistical Computing. p.^pp.
- 677 Tranter M, Skidmore M & Wadham J (2005) Hydrological controls on microbial communities  
678 in subglacial environments. *Hydrological Processes* **19**: 995-998.
- 679 Tranter M, Sharp MJ, Lamb HR, Brown GH, Hubbard BP & Willis IC (2002) Geochemical  
680 weathering at the bed of Haut Glacier d'Arolla, Switzerland—a new model. *Hydrological Processes*  
681 **16**: 959-993.
- 682 Wadham JL, Tranter M, Skidmore M, Hodson AJ, Priscu J, Lyons WB, Sharp M, Wynn P &  
683 Jackson M (2010) Biogeochemical weathering under ice: Size matters. *Global Biogeochem Cycles*  
684 **24**: n/a-n/a.

685 Wadham JL, Arndt S, Tulaczyk S, *et al.* (2012) Potential methane reservoirs beneath Antarctica.  
686 *Nature* **488**: 633-637.

687 Warnes GR, Bolker B, Bonebakker L, Gentleman R, Liaw WHA, Lumley T, Maechler M,  
688 Magnusson A, Moeller S & Schwartz M (2019) gplots: Various R programming tools for  
689 plotting data. p.^pp. <https://CRAN.R-project.org/package=gplots>.

690 Wilhelm L, Singer GA, Fasching C, Battin TJ & Besemer K (2013) Microbial biodiversity in  
691 glacier-fed streams. *ISME J* **7**: 1651-1660.

692 Yde JC, Finster KW, Raiswell R, Steffensen JP, Heinemeier J, Olsen J, Gunnlaugsson HP &  
693 Nielsen OB (2010) Basal ice microbiology at the margin of the Greenland ice sheet. *Annals of*  
694 *Glaciology* **51**: 71-79.

695 Žárský JD, Kohler TJ, Yde JC, Falteisek L, Lamarche-Gagnon G, Hawkings JR, Hatton JE &  
696 Stibal M (2018) Prokaryotic assemblages in suspended and subglacial sediments within a  
697 glacierized catchment on Qeqertarsuaq (Disko Island), west Greenland. *FEMS Microbiology*  
698 *Ecology* **94**: fiy100-fiy100.

699

700

## 701 Figures and Tables

702

703 **Figure 1.** Sampling locations of proglacial river waters in front of Leverett Glacier, Southwest  
704 Greenland. Labels (L1-L13) correspond to sampling times in Fig. 2. Sampling-time details are  
705 included in Supplementary Table 1.

706

707 **Figure 2.** Hydrogeochemical evolution of LG proglacial river and sampling details – (a)  
708 Timeseries of suspended sediment concentration (SSC; black) and inferred age of suspended-  
709 sediment-associated particulate organic carbon (POC) based on <sup>14</sup>C dating in red (data from  
710 Kohler *et al.*, 2017). Bordered coloured points indicate sampling time of waters used for DNA  
711 extraction overlaid onto the SSC timeseries; L1 samples were collected beneath river ice and  
712 no SSC data is available for those samples (see methods). The four abrupt increases in SSC  
713 between June 19<sup>th</sup> and July 15<sup>th</sup> correspond to outburst events (Lamarche-Gagnon *et al.* (2019);  
714 Kohler *et al.* (2017)). Approximative hydrological states of the LG drainage system are  
715 highlighted. (b) Discharge timeseries (black line) and ratios of major divalent-monovalent  
716 cations (D:M; points) of LG runoff (Hatton *et al.*, 2019). Colour of points reflect LG hydrological  
717 states; inset shows D:M of sub-river ice waters – note the difference in scale on the y-axis (data  
718 provided as Supplementary Information). Sampling time of waters used for DNA extraction  
719 are also highlighted as per **a** on the x-axis. (c) Major ion relationships diagrams (D:M and Na<sup>+</sup>-

720 normalised molar mixing ratios of  $\text{Ca}^{2+}$  and  $\text{HCO}_3^-$ ) of LG water samples alluding to  
721 increased/decreased silicate weathering; samples and colours are the same as in **b**. Lines on  
722 the left panel are linear regressions for samples taken before the emergence of the upwelling  
723 (dashed line), following the appearance of the upwelling but prior to the first outburst (orange  
724 line), during the outburst period (black line) and following the last outburst (amber line). See  
725 Hatton *et al.* (2019) for more detailed interpretations.

726

727 **Figure 3.** Relative abundance of major phyla (**a**), orders (**b**) and OTUs (>97% sequence  
728 similarity; **c**) in LG microbial assemblages. Data is shown as both box plot (left) and bar plot  
729 (right); only the top 10 taxa are shown in each bar plot whereas the top 20 orders (**b**) and OTUs  
730 (**c**) are shown in the box plots. The box mid-lines represent medians; the interquartile range  
731 (IQR) is represented by the lower and upper box boundaries, which denote the 25th and 75th  
732 percentiles, respectively; whiskers indicate confidence intervals 1.5 times the IQR, and points  
733 are outliers. Colour of points correspond to sampling time – same colour scheme as Fig. 2 is  
734 used. The dashed lines in the box plots mark 1 % relative abundance.

735

736 **Figure 4.** (**a**) Principal component analysis (PCoA) and (**b**) non-metric dimensional scaling  
737 (nMDS) projections of Bray-Curtis dissimilarity matrix on LG communities. Small dots  
738 represent replicate samples and large ones are averages. Colours and groupings are the same  
739 as in Fig. 2. The thick black line links average points by sampling time. On the PCoA, axes  
740 indicate explained level of variation; the nMDS stress level is 0.19,  $R^2 = 0.90$ . Note the  
741 difference in scale between axis 1 and 2 for both ordination plots. Clusters represent  
742 communities grouped by “hydrological states” as per Fig. 2, with clusters having significantly  
743 different centroids: Permanova for clusters highlighted on the PCoA ( $R^2 = 0.62$ , Pseudo-F =  
744 8.21,  $p < 0.001$ ); permanova for clusters highlighted on the nMDS ( $R^2 = 0.72$ , Pseudo-F =  
745 7.24,  $p < 0.001$ ). Dispersion of homogeneity tests show no significant difference in dispersion  
746 between clusters: pseudo F = 1.00,  $p > 0.1$  for the PCoA; pseudo F = 1.23,  $p > 0.1$  for the  
747 nMDS. L9 samples (light green) are highlighted as “transition” between earlier outbursts and  
748 outburst 4. Double black arrows for the x axis reflect the approximate spectrum of the  
749 hydrological state at the time of sampling; does not apply to the pre-melt (blue) samples. (**c**)  
750 Heatmap visualisation of the top 20 OTUs most influencing clustering on the ordination plots  
751 above (28 OTUs total; 20 shared and 8 unique to the PCoA and nMDS ordinations). Colours  
752 (blue to red) show abundance of an OTU relative to the average amongst all samples for that  
753 OTU; cooler colours indicate lower than average and warmer higher. (for relative abundance

754 of that OTU per sample (i.e. relative to other OTUs), see Table 2). Colours of samples reflect  
755 main hydrological states as per Fig. 2. Taxonomic information down to the order level  
756 (separated by dashes) for each OTU is indicated, when available.

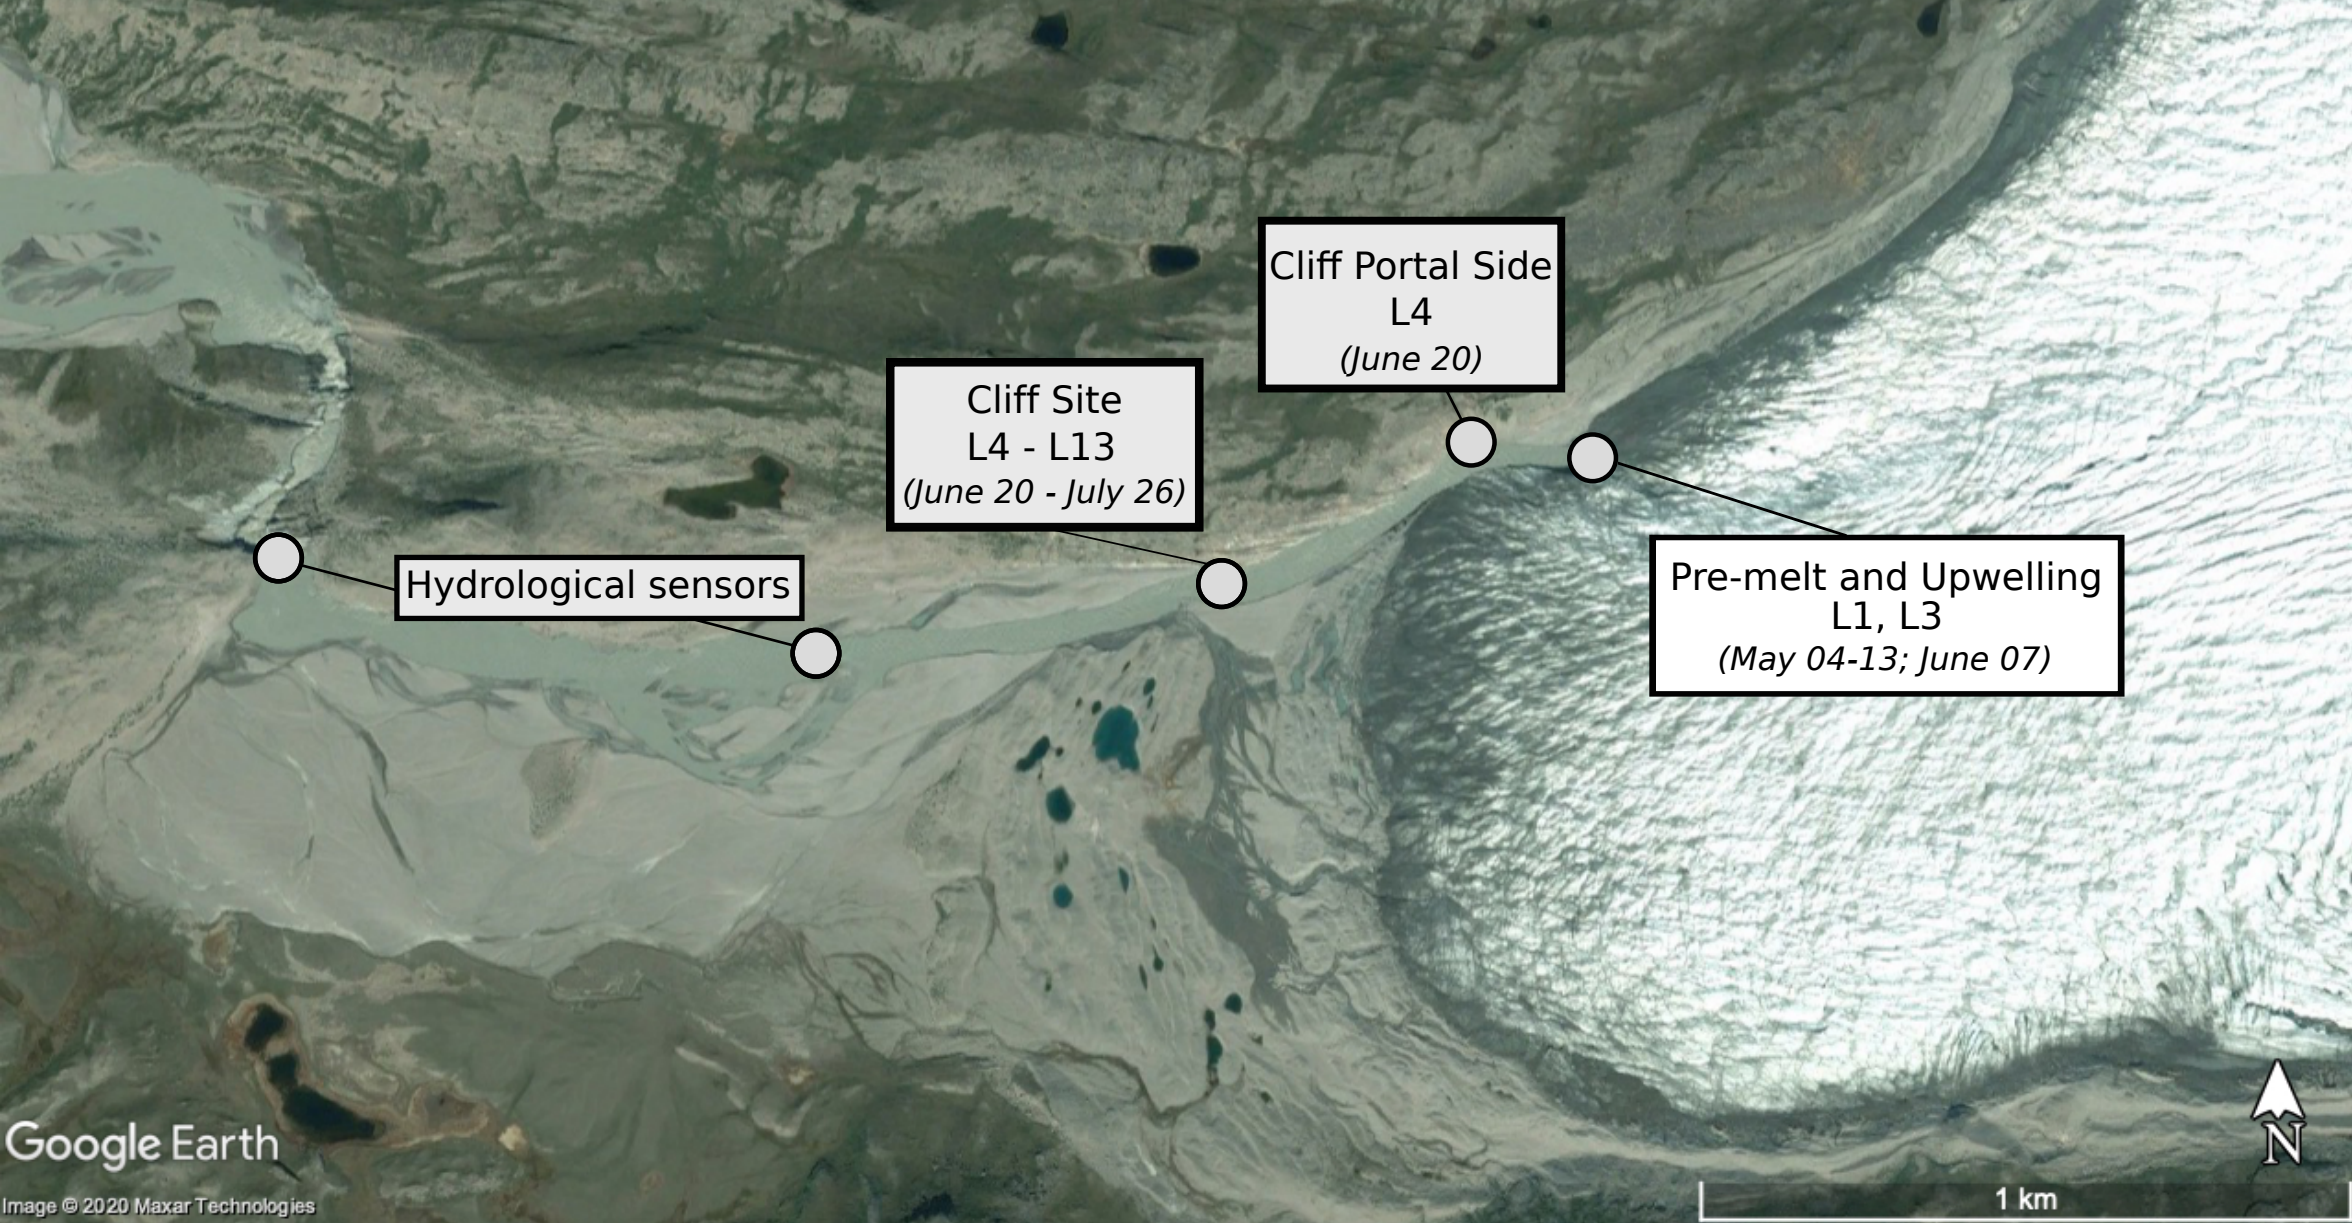

**Figure 1**



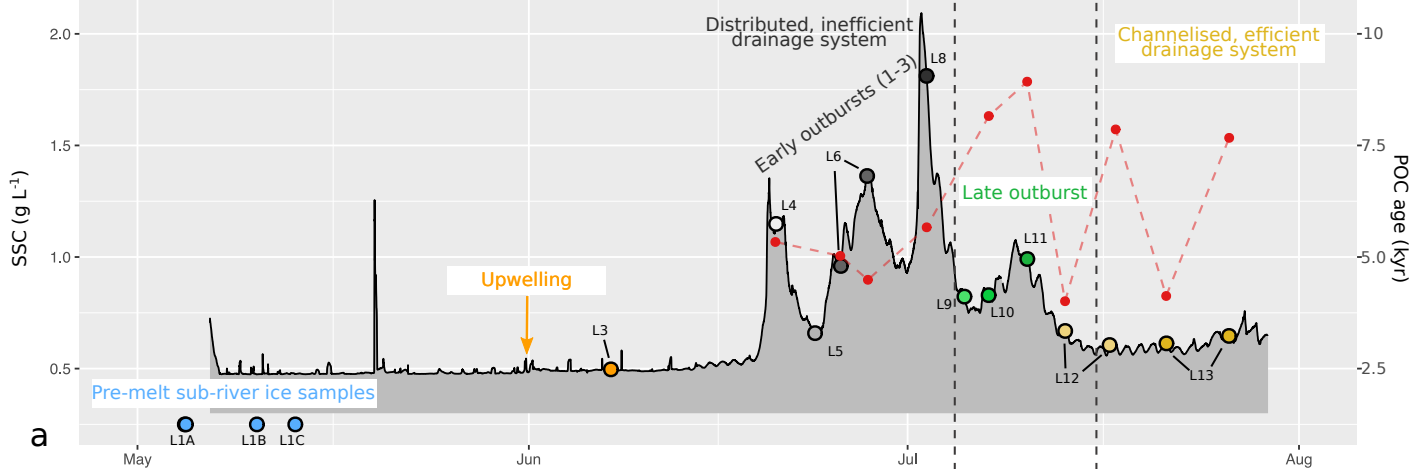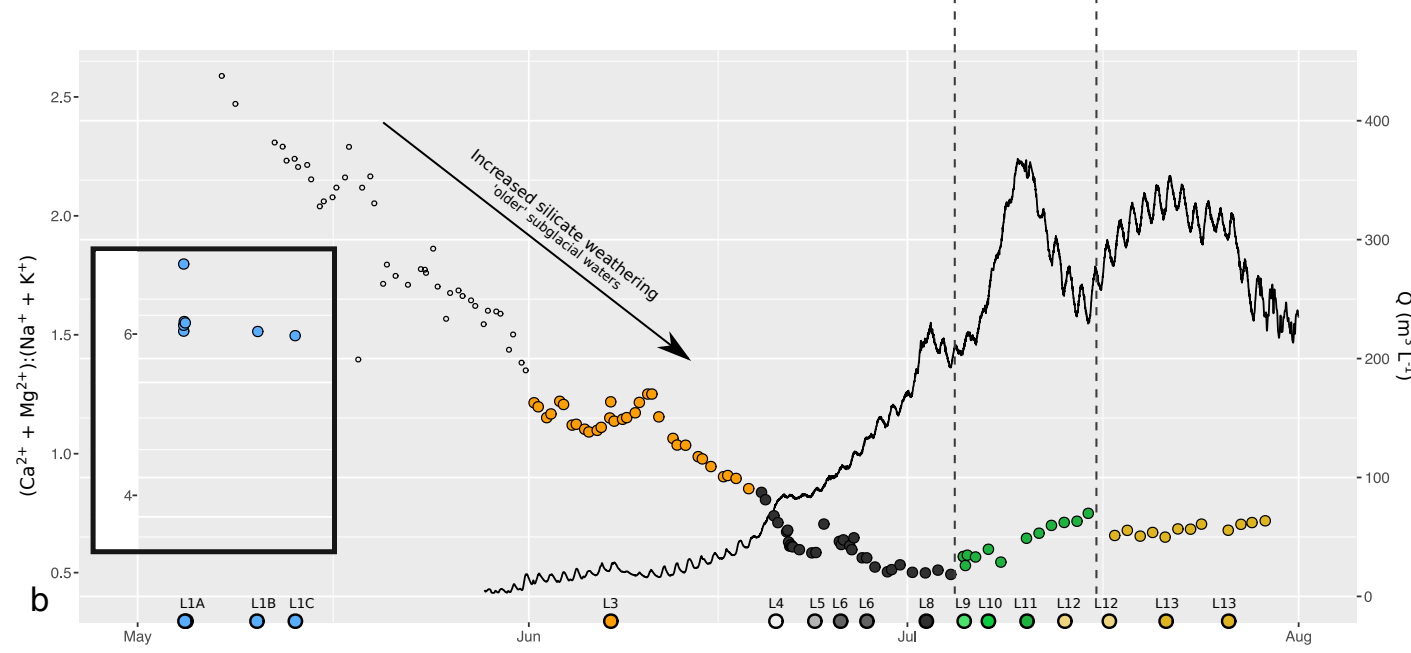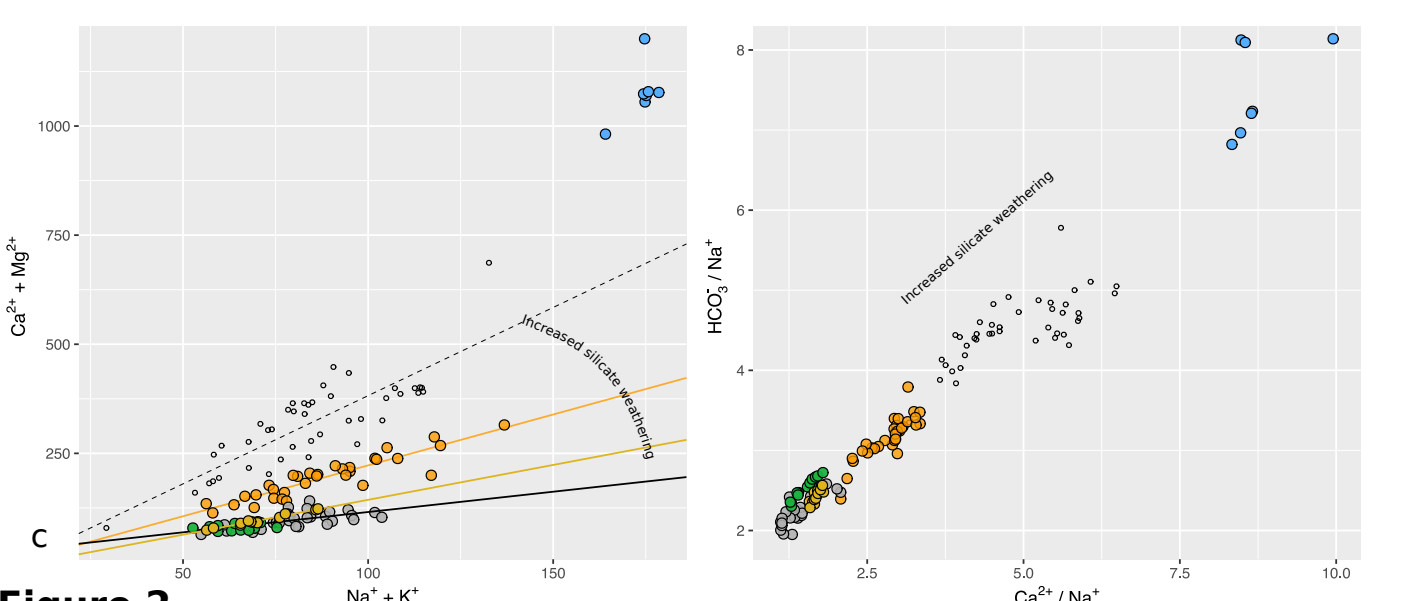

**Figure 2**

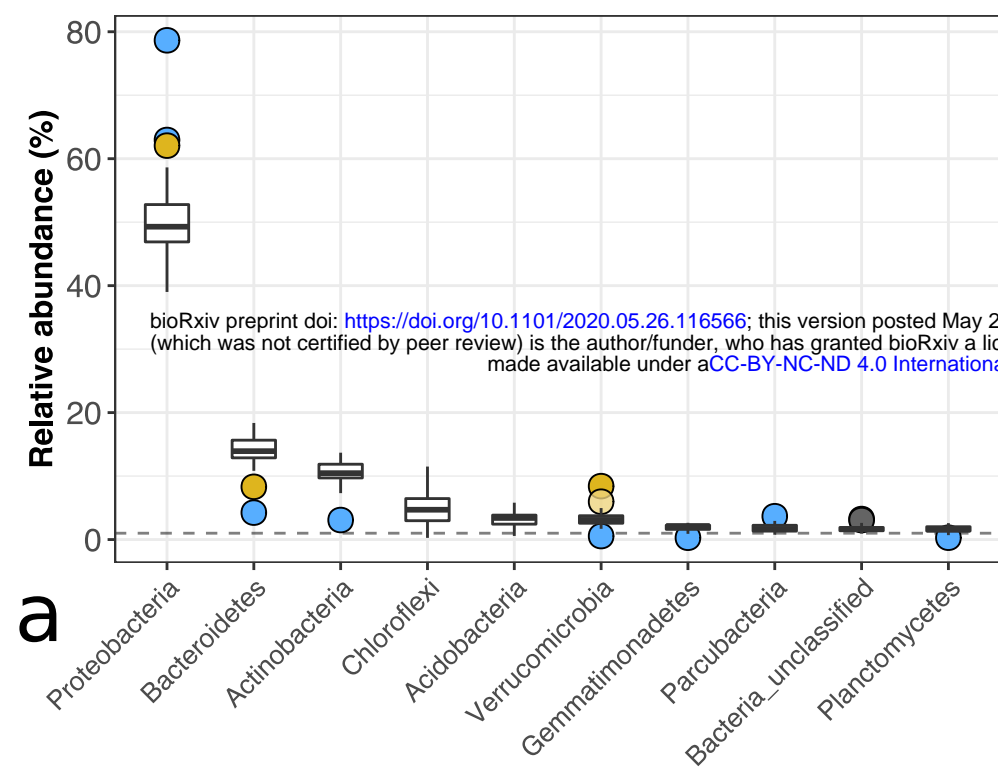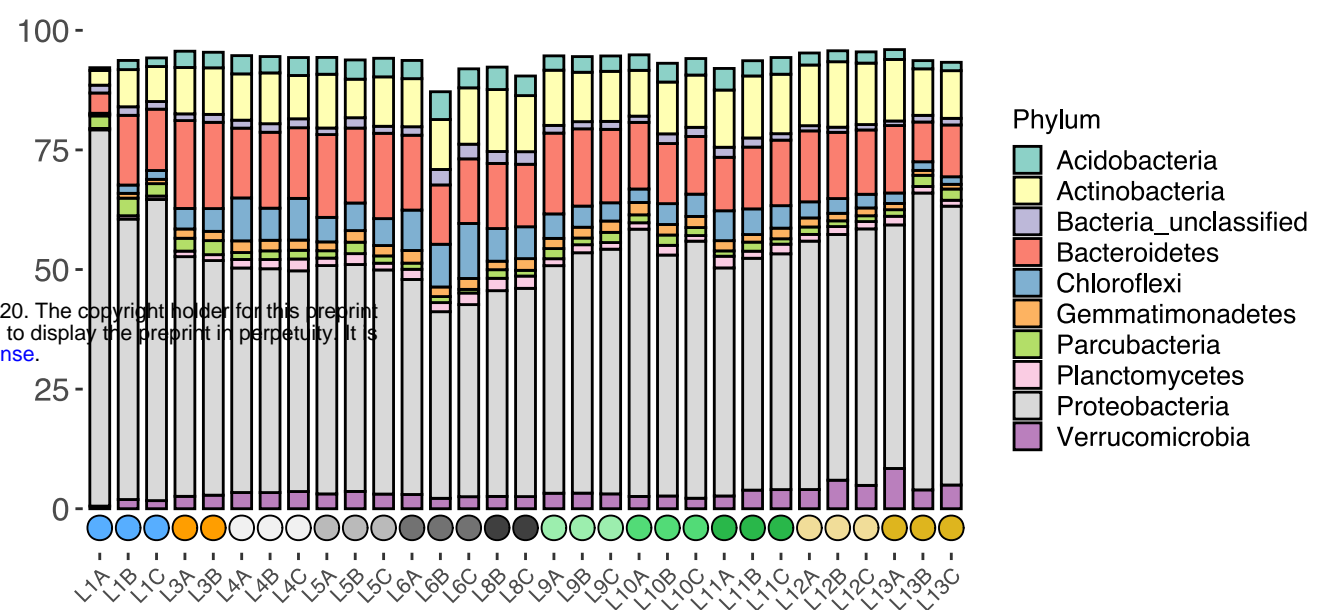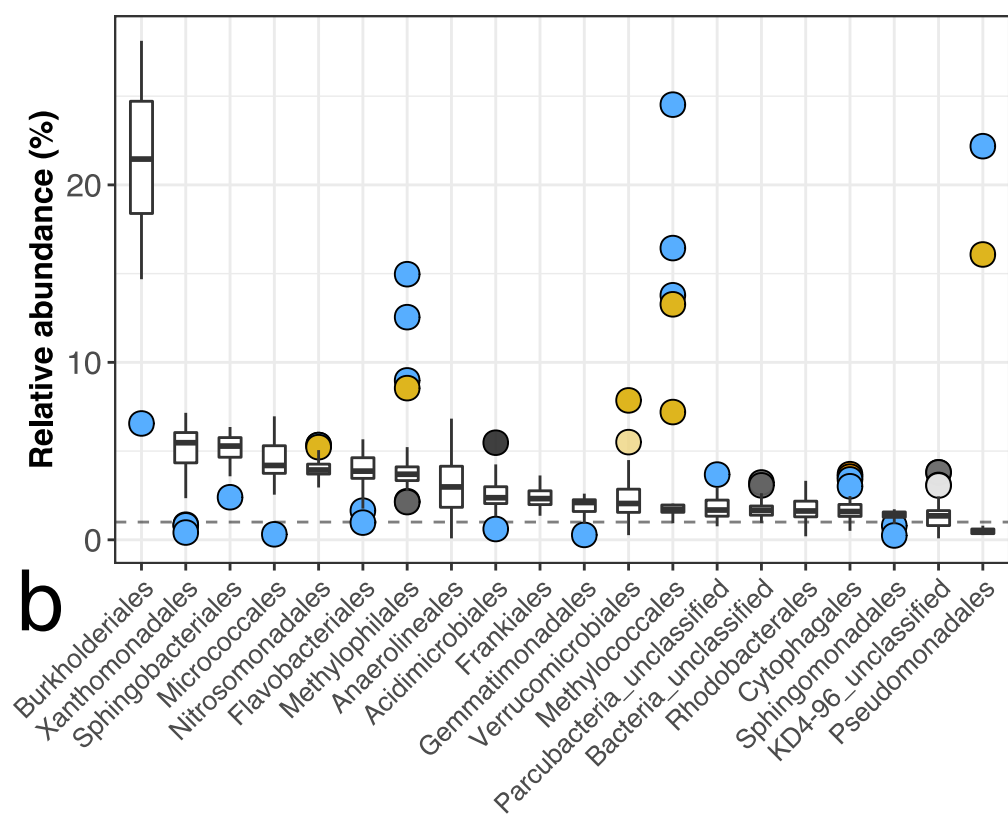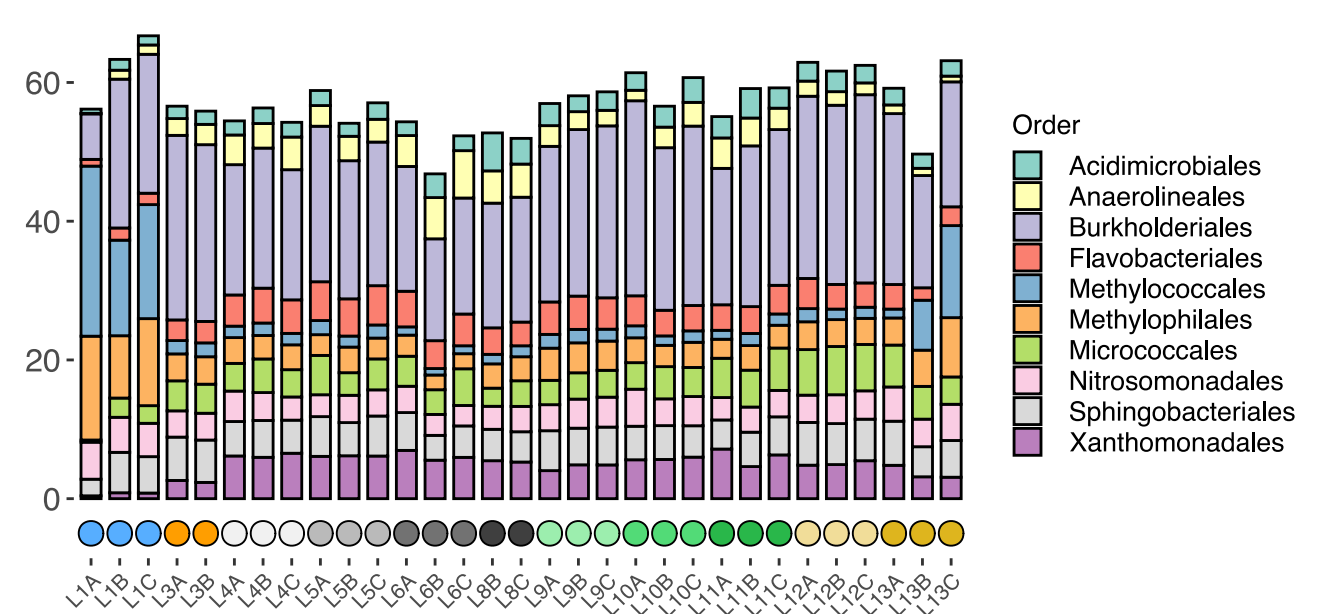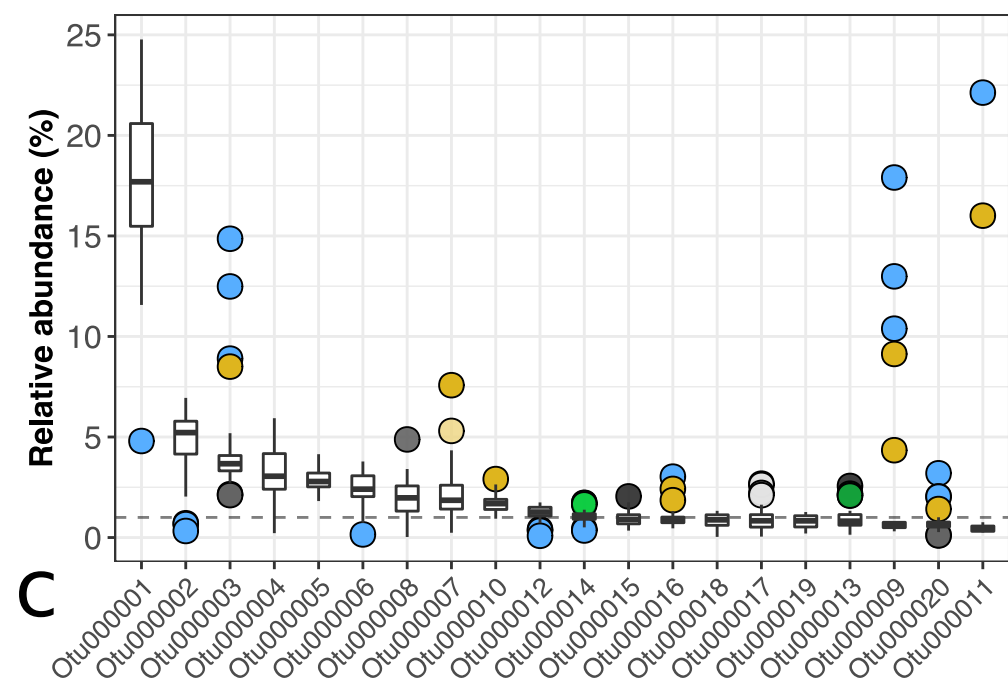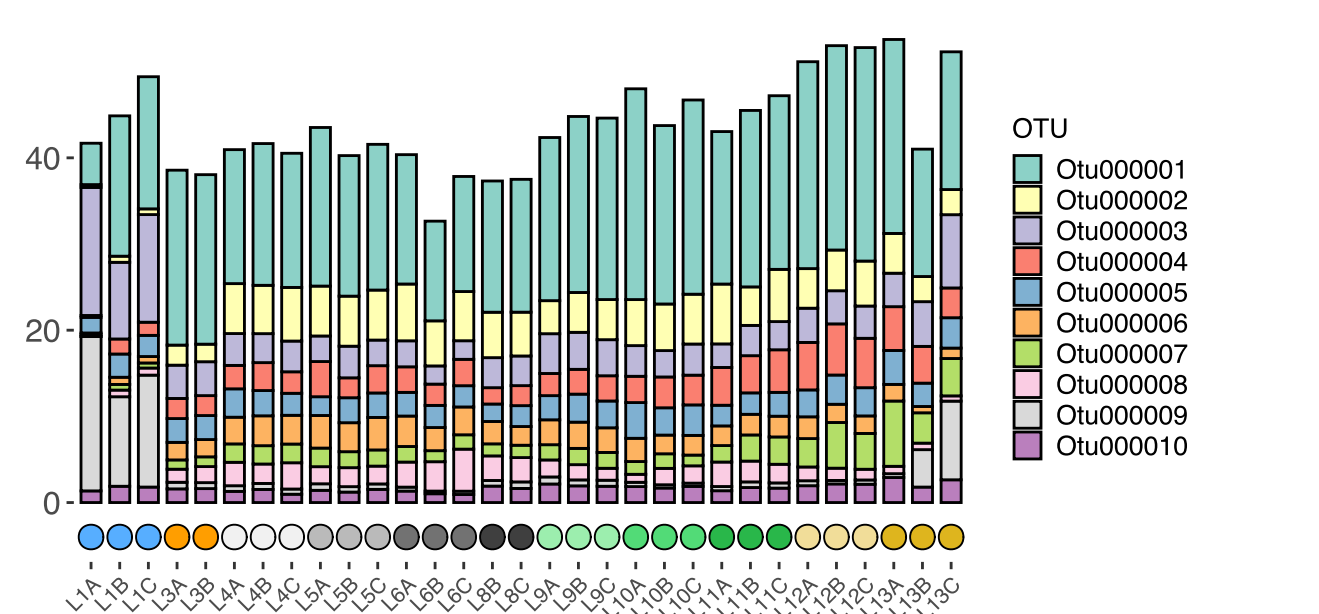

**Figure 3**

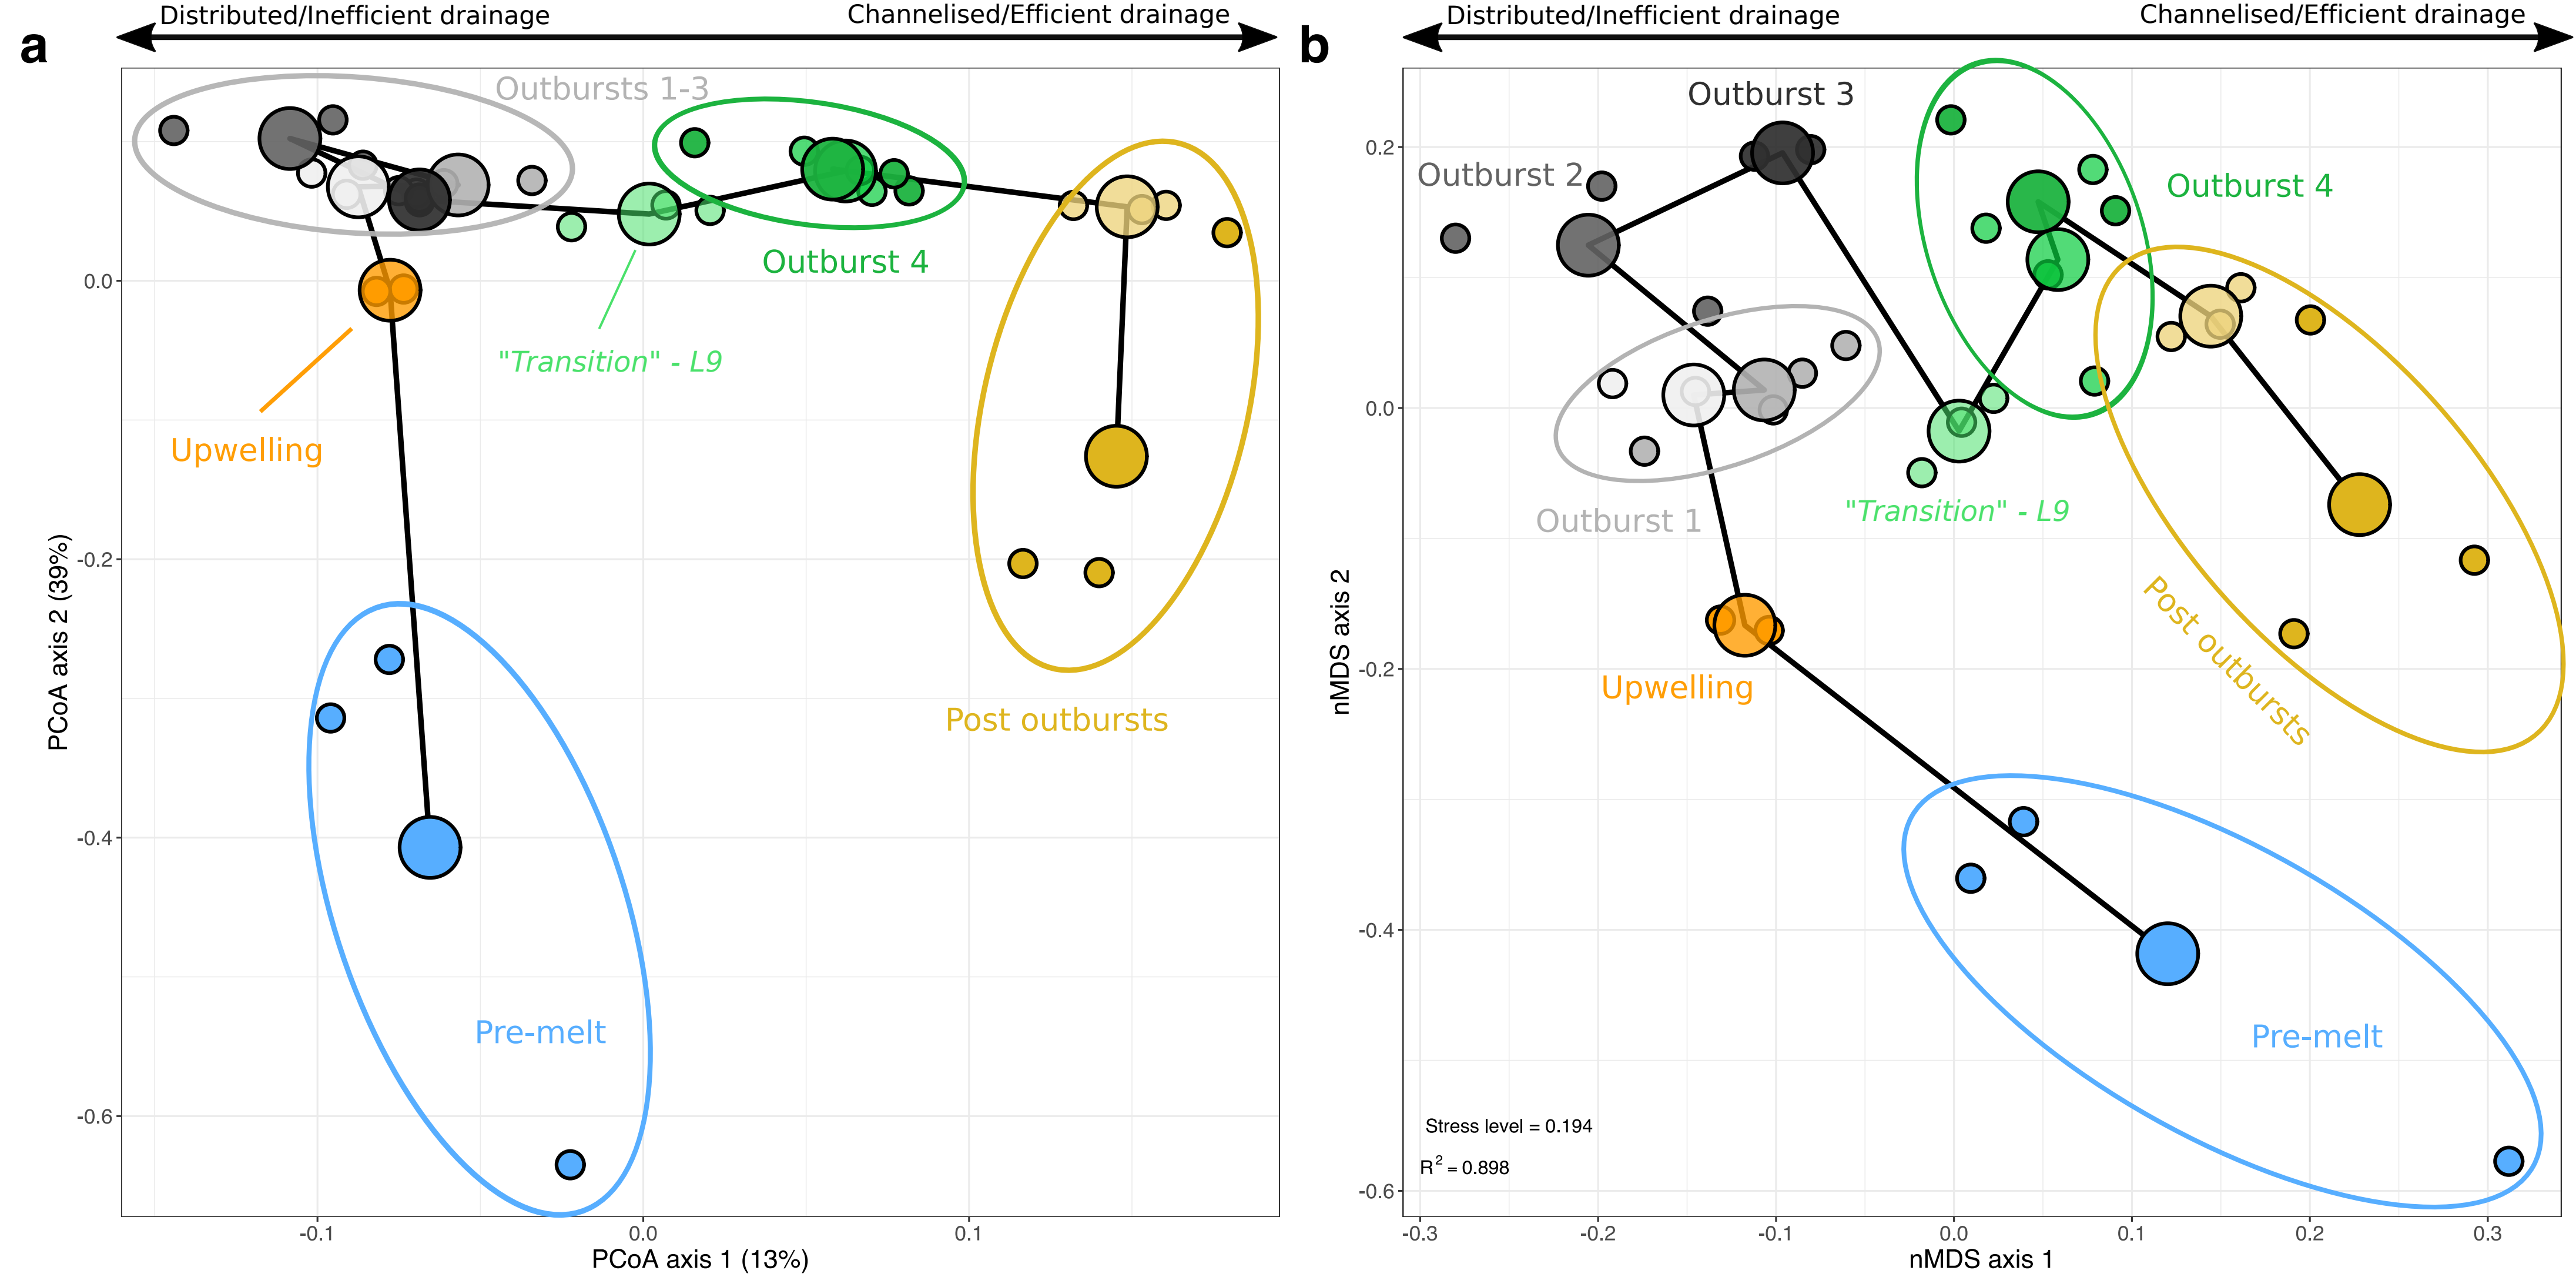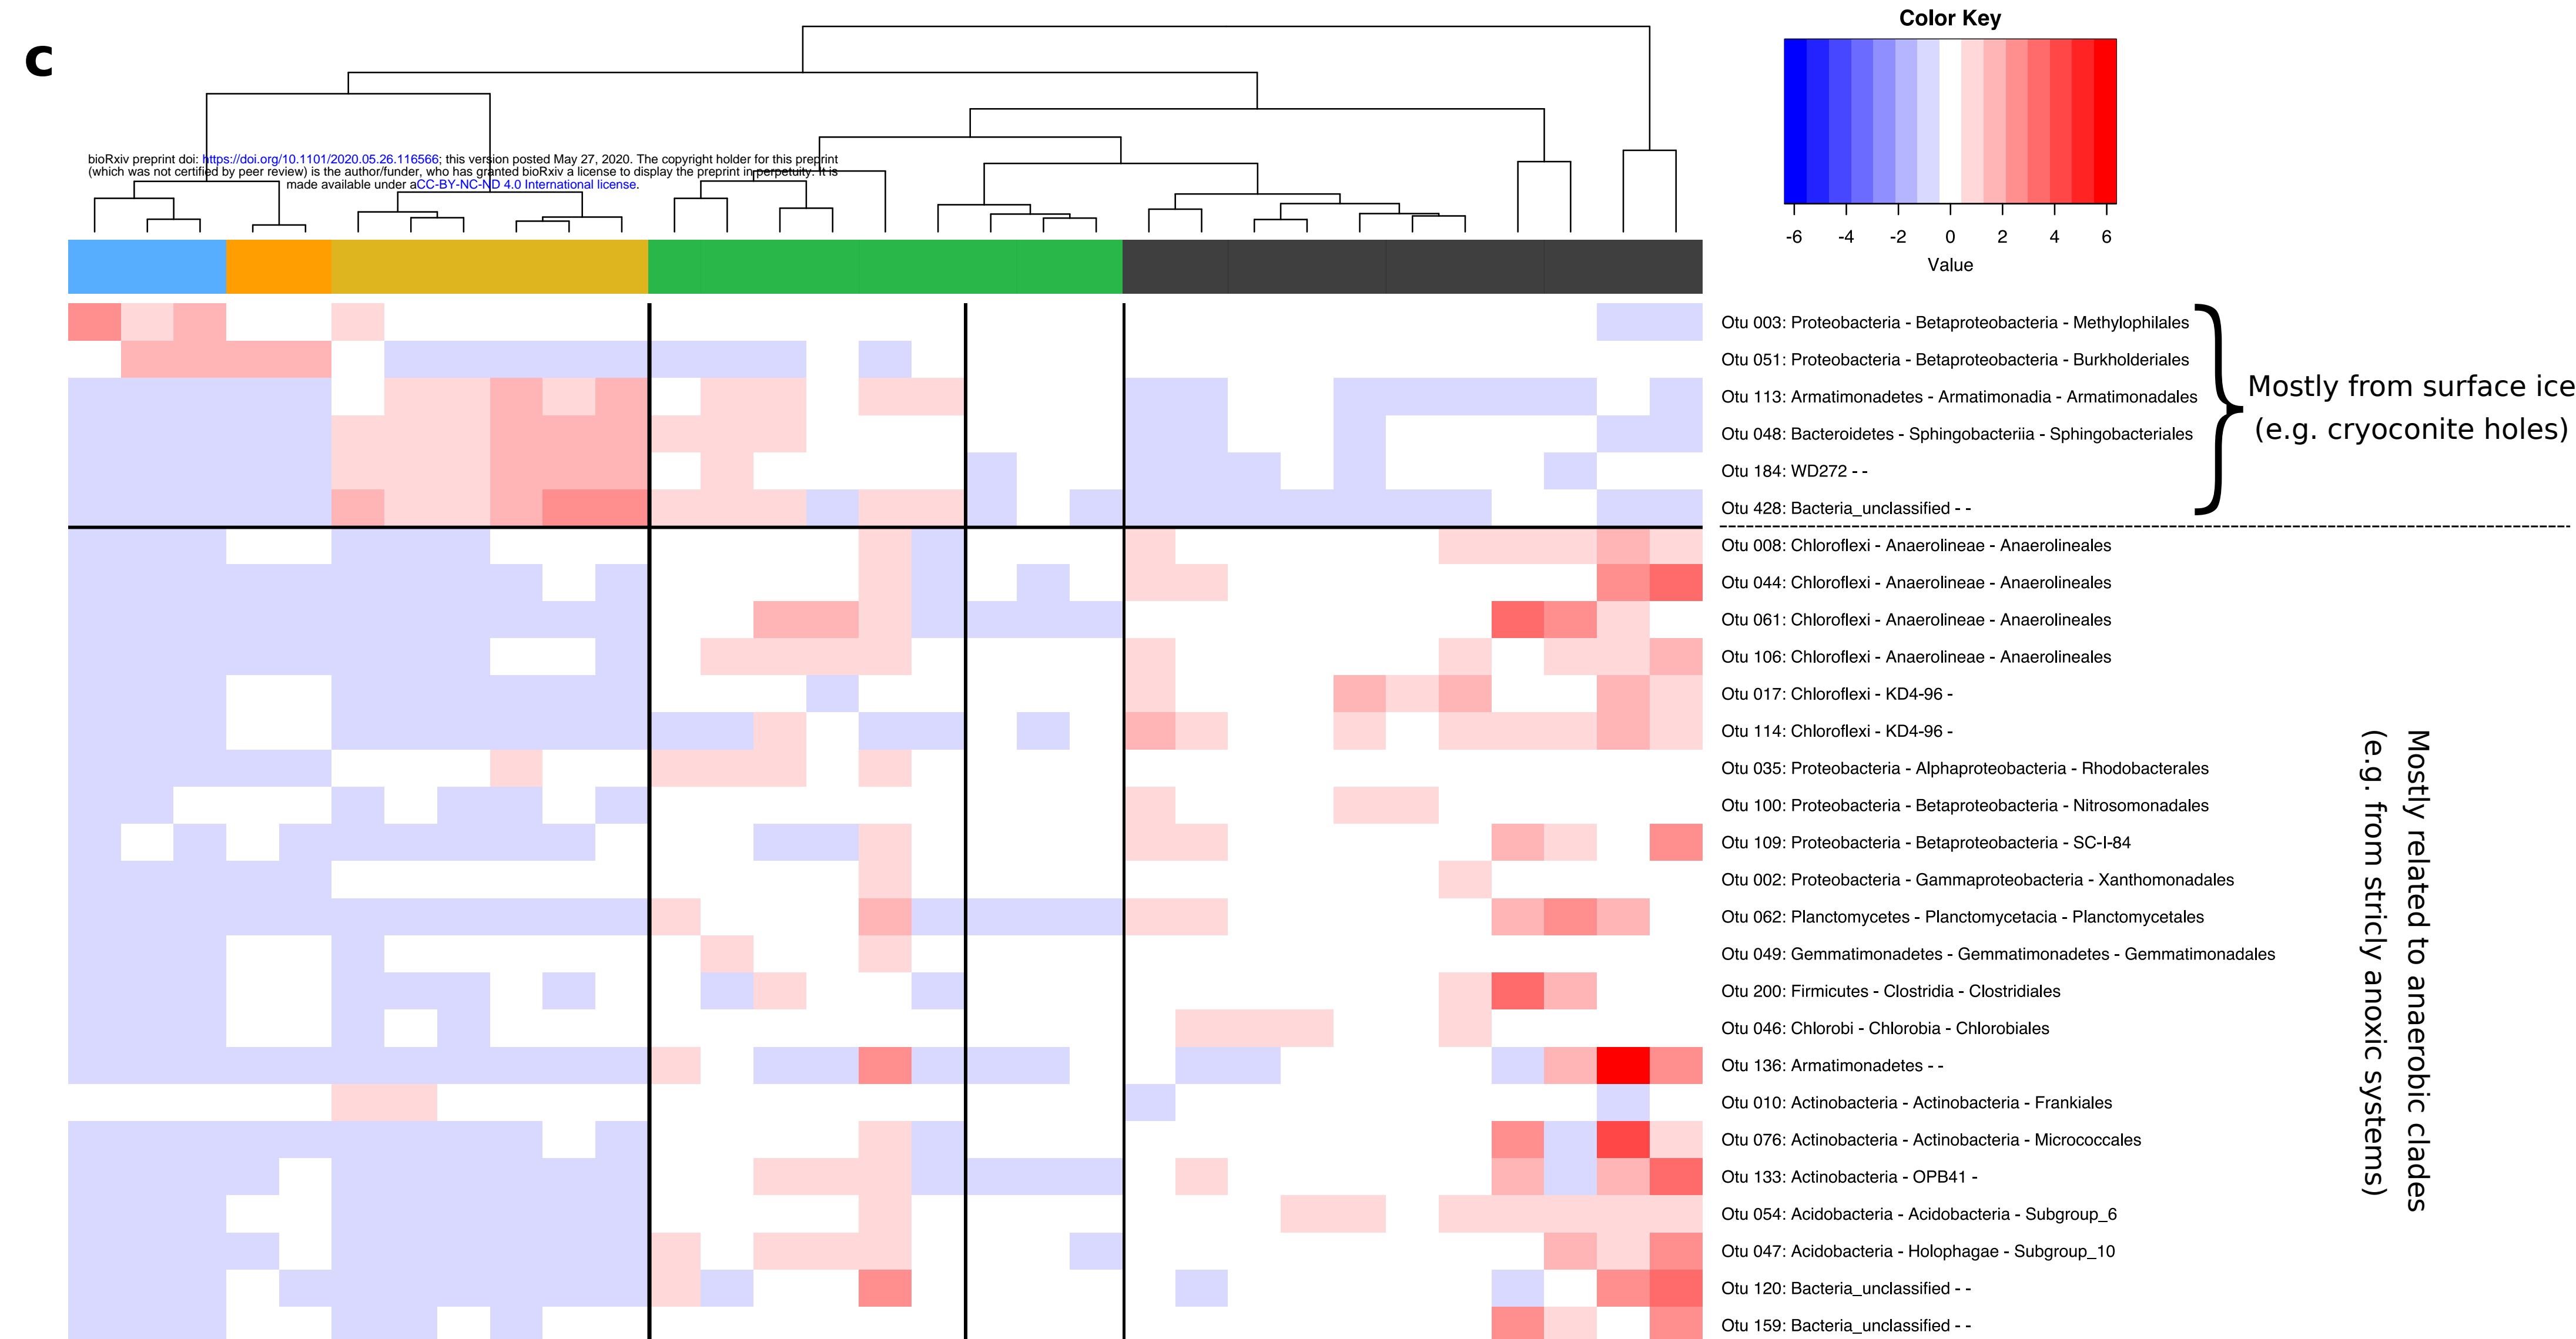

**Figure 4**

**Table 1.** Taxonomic and inferred metabolic description of LG dominant OTU representative sequences.

| OTU# | Relative abundance (%) | Order - Nearest BLAST hit (% identity)        | Habitat of nearest blast hit                                     | Nearest taxonomic representative (% identity)            | Description of nearest isolate                                                                           |
|------|------------------------|-----------------------------------------------|------------------------------------------------------------------|----------------------------------------------------------|----------------------------------------------------------------------------------------------------------|
| 1    | 18.01                  | Burkholderiales - MK703815.1 (100)            | Mine suboxic water                                               | <i>Rhodoferax ferrireducens</i> - NR_074760.1 (100)      | Fe(III) reducer; psychrotolerant; facultative anaerobe                                                   |
| 2    | 4.55                   | Xanthomonadales - MG569732.1 (100)            | Subglacial sediments                                             | <i>Lysobacter concretionis</i> - NR_114021.1 (95)        | Putative anaerobe                                                                                        |
| 3    | 4.53                   | Methylophilales - AB991269.1 (100)            | Associated with glacier ice-worms                                | <i>Methylotenera versatilis</i> - NR_074693.1 (99)       | Related to isolates from glacier communities; aerobic; C1-compound oxidiser                              |
| 4    | 3.26                   | Micrococcales - MG569735.1 (100)              | Subglacial sediments                                             | <i>Glaciibacter superstes</i> - NR_041679.1 (99)         | From permafrost ice wedge                                                                                |
| 5    | 2.87                   | Nitrosomonadales - KY692010.1 (100)           | Oligotrophic Andean lake sediments                               | <i>Sideroxydans lithotrophicus</i> - NR_074731.1 (98)    | Fe(II) oxidizer; chemolithoautotroph; prevalent at neutral to high pH (at anoxic-oxic transition layers) |
| 6    | 2.40                   | Flavobacteriales - KC606558.1 (100)           | Groundwater                                                      | <i>Aureivirga marina</i> - NR_109513.1 (96)              | Aerobe                                                                                                   |
| 7    | 2.25                   | Verrucomicrobiales - MH313580.1 (100)         | River sediment                                                   | <i>Luteolibacter luojiensis</i> - NR_109500.1 (99)       | From arctic tundra                                                                                       |
| 8    | 1.94                   | Anaerolineales - EU644156.1 (99.6)            | Active layer of permafrost polygon                               | <i>Leptolinea tardivitalis</i> - NR_040971 (90)          | Putative anaerobe                                                                                        |
| 9    | 2.25                   | Methylococcales - MN602493.1 (100)            | Lake Baikal sediment                                             | <i>Methylobacter tundripaludum</i> - NR_042107.1 (100)   | Methanotroph isolated from high Arctic active layer                                                      |
| 10   | 1.70                   | Frankiales - HM635800.1 (100)                 | Subglacial sediments                                             | <i>Terrabacter aerophilus</i> - NR_116367 (92)           | Aerobe                                                                                                   |
| 11   | 1.63                   | Pseudomonadales - MH930114.1 (100)            | Tundra soil                                                      | <i>Pseudomonas lini</i> - NR_029042 (100)                | Facultative anaerobe                                                                                     |
| 12   | 1.21                   | Flavobacteriales - AB583919.1 (100)           | Groundwater; incubation promoting water-rock-microbe interaction | <i>Aureivirga marina</i> - NR_109513.1 (95)              | Aerobe                                                                                                   |
| 13   | 0.99                   | Acidimicrobiales - KY943334.1 (100)           | Acid mine drainage affected sediments                            | <i>Ilumatobacter fluminis</i> - NR_041633.1 (93.7)       | Aerobe                                                                                                   |
| 14   | 1.04                   | Hydrogenophilales - MF042748.1 (100)          | Groundwater                                                      | <i>Thiobacillus thioparus</i> - NR_117864.1 (99)         | Putative chemolithoautotroph and sulphide oxidiser                                                       |
| 15   | 0.98                   | Acidimicrobiales - KY944441.1 (99.6)          | Acid mine drainage affected sediments                            | <i>Ilumatobacter fluminis</i> - NR_041633.1 (89.7)       |                                                                                                          |
| 16   | 1.01                   | Methylococcales - AB754129.1 (100)            | Lake water                                                       | <i>Methylovulum miyakonense</i> - NR_112920.1 (96)       | Methanotroph                                                                                             |
| 17   | 0.95                   | KD4-96_unclassified - GQ421053 (100)          | Roopkund Glacier, Himalayan mountain                             | <i>Ureibacillus suwonensis</i> - NR_043232.1 (88)        |                                                                                                          |
| 18   | 0.84                   | Bacteroidia_Incertae_Sedis - JX222821.1 (100) | Subsurface aquifer                                               | <i>Maribellus luteus</i> - NR_165017.1 (93.7)            | Facultative anaerobe                                                                                     |
| 19   | 0.80                   | Holophagales - KY691174.1 (100)               | Oligotrophic Andean lake sediments                               | <i>Holophaga foetida</i> - NR_036891.1 (96.8)            | Anaerobic acetogen degrading methoxylated aromatic compounds                                             |
| 20   | 0.78                   | Nitrosomonadales - KY690514.1 (100)           | Oligotrophic Andean lake sediments                               | <i>Gallionella capsiferriformans</i> - NR_115755.1 (100) | Circumneutral microaerobic Fe(II) oxidiser                                                               |

Orders are derived from the SILVA database (v. 123; Quast *et al.*, 2012). Nearest taxonomic members are from Blastn searches; percentage identity to the OTU representative sequence is listed

in parenthesis. Description and inferred metabolism is derived from NCBI entries of nearest taxonomic isolate or sequences; only descriptions to isolates sharing >90% sequence identity are listed. Relative abundance corresponds to entire dataset (i.e. samples L1-L13).

**Table 2.** Taxonomic and inferred metabolic description of the representative sequence OTUs listed in Figure 4.

| OTU# | Relative abundance (%) | Order - Nearest BLAST hit (% identity)           | Habitat of nearest blast hit                 | Nearest taxonomic representative (% identity)               | Description of nearest isolate                          |
|------|------------------------|--------------------------------------------------|----------------------------------------------|-------------------------------------------------------------|---------------------------------------------------------|
| 51   | 0.31                   | Burkholderiales - KT752934.1 (100)               | Surface glacier ice                          | <i>Aquaspirillum arcticum</i> - NR_040898.1 (100)           | Aerobe                                                  |
| 113  | 0.10                   | Armatimonadales - LC076737.1 (100)               | Cryoconite hole                              | <i>Pelotomaculum thermopropionicum</i> - NR_074685.1 (84.9) |                                                         |
| 48   | 0.32                   | Sphingobacteriales - LC030259.1 (100)            | Cryoconite hole                              | <i>Solitalea koreensis</i> - NR_044568.1 (91)               | Aerobe; from soil                                       |
| 184  | 0.06                   | WD272_unclassified - LC030263.1 (100)            | Cryoconite hole                              | <i>Dokdonella immobilis</i> - NR_108377.1 (82.5)            |                                                         |
| 428  | 0.02                   | Bacteria_unclassified - LC030292.1 (100)         | Cryoconite hole                              | <i>Desulfuromusa ferrireducens</i> - NR_043214.1 (80.1)     |                                                         |
| 44   | 0.23                   | Anaerolineales - LN715682.1 (100)                | Methane-emitting mire Soils                  | <i>Ornatilinea aprima</i> - NR_109544.1 (90.5)              | Obligate anaerobe and fermenter                         |
| 61   | 0.20                   | Anaerolineales - GQ123346.1 (99.6)               | Hyporheic zone of fluvial sediments          | <i>Ornatilinea aprima</i> - NR_109544.1 (91.3)              | Obligate anaerobe and fermenter                         |
| 106  | 0.10                   | Anaerolineales - GQ421109.1 (99.2)               | Roopkund Glacier, Himalayan mountain         | <i>Ornatilinea aprima</i> - NR_109544.1 (91.3)              | Obligate anaerobe and fermenter                         |
| 114  | 0.10                   | KD4-96_unclassified - LC124750.1 (100)           | Sediments of Lake Skallen, Antarctica        | <i>Thermobaculum terrenum</i> - NR_074347.1 (88.1)          |                                                         |
| 35   | 0.48                   | Rhodobacterales - HM635813.1 (100)               | Subglacial sediments                         | <i>Pseudorhodobacter psychrotolerans</i> - NR_148653.1 (98) | Facultative anaerobe - psychrotolerant                  |
| 100  | 0.12                   | Nitrosomonadales - AB826345.1 (100)              | Cryoconite hole                              | <i>Pandoraea thiooxydans</i> - NR_116008.1 (92.9)           | Facultative chemolithoautotrophic, thiosulfate oxidizer |
| 109  | 0.10                   | SC-I-84 - KY897122.1 (100)                       | Wetland                                      | <i>Laribacter hongkongensis</i> - NR_025167.1 (92.9)        | Facultative anaerobe                                    |
| 62   | 0.20                   | Planctomycetales - KP787573.1 (100)              | Heavy-metal contaminated river sediments     | <i>Schlesneria paludicola</i> - NR_042466.1 (93.3)          | Facultative anaerobe                                    |
| 49   | 0.32                   | Gemmatimonadales - KY943005.1 (100)              | Acid mine drainage affected sediments        | <i>Gemmatimonas phototrophica</i> - NR_136770.1 (90.1)      | Microaerophilic                                         |
| 200  | 0.04                   | Clostridiales - HQ133186.1 (99.6)                | Hexadecane-degrading methanogenic consortium | <i>Saccharofermentans acetigenes</i> - NR_115340.1 (96.1)   | Fermenter                                               |
| 46   | 0.33                   | Chlorobiales - GQ397011.1 (100)                  | Recently deglaciated soils                   | <i>Prosthecochloris indica</i> - NR_132595.1 (83.5)         |                                                         |
| 136  | 0.06                   | Armatimonadetes_unclassified - KT915869.1 (99.2) | Biofilm over floodplain sediments            | <i>Fimbriimonas ginsengisoli</i> - NR_121726.1 (85)         |                                                         |
| 76   | 0.12                   | Micrococcales - JF420765.1 (99.6)                | Glacier sediments                            | <i>Lysinimicrobium iriomotense</i> - NR_145855 (98.8)       | Facultative anaerobe                                    |

|            |      |                                             |                                                          |                                                            |
|------------|------|---------------------------------------------|----------------------------------------------------------|------------------------------------------------------------|
| <b>133</b> | 0.06 | OPB41_unclassified -<br>KY692067.1 (100)    | Lake sediments                                           | <i>Alkalibaculum bacchi</i> –<br>NR_116669.1 (85.6)        |
| <b>54</b>  | 0.26 | Subgroup_6 –<br>JF716010.1 (100)            | Front of the Mittivakkat Glacier,<br>southeast Greenland | <i>Vicinamibacter silvestris</i> –<br>NR_151905.1 (89.3)   |
| <b>47</b>  | 0.27 | Subgroup_10 –<br>JF420762.1 (100)           | Glacier sediments                                        | <i>Thalassobaculum salexigens</i> -<br>NR_116122.1 (87.8)  |
| <b>120</b> | 0.07 | Bacteria_unclassified -<br>DQ642392.1 (100) | Anoxic zone of a meromictic lake                         | <i>Clostridium chartatabidum</i> -<br>NR_029239.3 (84)     |
| <b>159</b> | 0.07 | Bacteria_unclassified -<br>GQ421012.1 (100) | Roopkund Glacier, Indian Himalayas                       | <i>Desulfohalotomaculum peckii</i> -<br>NR_109724.1 (82.5) |

53 Orders are derived from the SILVA database (v. 123; Quast *et al.*, 2012). Nearest taxonomic members are from Blastn searches; percentage identity to the OTU representative sequence is listed  
54 in parenthesis. Description and inferred metabolism is derived from NCBI entries of nearest taxonomic isolate or sequences; only descriptions to isolates sharing >90% sequence identity are  
55 listed. Relative abundance corresponds to entire dataset (i.e. samples L1-L13).
